# Supplementary material for: Practice assistants´ perceived mental workload: A cross-sectional study with 550 German participants addressing work content, stressors, resources, and organizational structure
Source: PubMed Central journal article supplement (PMC7529273; doi:10.1371/journal.pone.0240052), 2020-10-01
Supplement: pone.0240052.s002.pdf [file pone.0240052.s002.pdf]

# PLOS ONE

## Practice assistants' perceived mental work load: A cross-sectional study with 550 German participants addressing work content, stressors, resources, and organizational structure

--Manuscript Draft--

|                               |                                                                                                                                                                                                                                                                                                                                                                                                                                                                                                                                                                                                                                                                                                                                                                                                                                                                                                                                                                                                                                                                                                                                                                                                                                                                                                                                                                                                                                                                                                                                                                                                                                                                                                                                                                                                                                                                                                                                                                                                                                                                                                                                                                                                                                                                                                                                              |
|-------------------------------|----------------------------------------------------------------------------------------------------------------------------------------------------------------------------------------------------------------------------------------------------------------------------------------------------------------------------------------------------------------------------------------------------------------------------------------------------------------------------------------------------------------------------------------------------------------------------------------------------------------------------------------------------------------------------------------------------------------------------------------------------------------------------------------------------------------------------------------------------------------------------------------------------------------------------------------------------------------------------------------------------------------------------------------------------------------------------------------------------------------------------------------------------------------------------------------------------------------------------------------------------------------------------------------------------------------------------------------------------------------------------------------------------------------------------------------------------------------------------------------------------------------------------------------------------------------------------------------------------------------------------------------------------------------------------------------------------------------------------------------------------------------------------------------------------------------------------------------------------------------------------------------------------------------------------------------------------------------------------------------------------------------------------------------------------------------------------------------------------------------------------------------------------------------------------------------------------------------------------------------------------------------------------------------------------------------------------------------------|
| <b>Manuscript Number:</b>     | PONE-D-20-07803R1                                                                                                                                                                                                                                                                                                                                                                                                                                                                                                                                                                                                                                                                                                                                                                                                                                                                                                                                                                                                                                                                                                                                                                                                                                                                                                                                                                                                                                                                                                                                                                                                                                                                                                                                                                                                                                                                                                                                                                                                                                                                                                                                                                                                                                                                                                                            |
| <b>Article Type:</b>          | Research Article                                                                                                                                                                                                                                                                                                                                                                                                                                                                                                                                                                                                                                                                                                                                                                                                                                                                                                                                                                                                                                                                                                                                                                                                                                                                                                                                                                                                                                                                                                                                                                                                                                                                                                                                                                                                                                                                                                                                                                                                                                                                                                                                                                                                                                                                                                                             |
| <b>Full Title:</b>            | Practice assistants' perceived mental work load: A cross-sectional study with 550 German participants addressing work content, stressors, resources, and organizational structure                                                                                                                                                                                                                                                                                                                                                                                                                                                                                                                                                                                                                                                                                                                                                                                                                                                                                                                                                                                                                                                                                                                                                                                                                                                                                                                                                                                                                                                                                                                                                                                                                                                                                                                                                                                                                                                                                                                                                                                                                                                                                                                                                            |
| <b>Short Title:</b>           | Practice assistants' perceived mental work load                                                                                                                                                                                                                                                                                                                                                                                                                                                                                                                                                                                                                                                                                                                                                                                                                                                                                                                                                                                                                                                                                                                                                                                                                                                                                                                                                                                                                                                                                                                                                                                                                                                                                                                                                                                                                                                                                                                                                                                                                                                                                                                                                                                                                                                                                              |
| <b>Corresponding Author:</b>  | Jan Hoffmann<br>Uniklinik Köln<br>Cologne, NRW GERMANY                                                                                                                                                                                                                                                                                                                                                                                                                                                                                                                                                                                                                                                                                                                                                                                                                                                                                                                                                                                                                                                                                                                                                                                                                                                                                                                                                                                                                                                                                                                                                                                                                                                                                                                                                                                                                                                                                                                                                                                                                                                                                                                                                                                                                                                                                       |
| <b>Keywords:</b>              | practice assistants; Primary care; mental workload; psychosocial risk assessment; workplace characteristics                                                                                                                                                                                                                                                                                                                                                                                                                                                                                                                                                                                                                                                                                                                                                                                                                                                                                                                                                                                                                                                                                                                                                                                                                                                                                                                                                                                                                                                                                                                                                                                                                                                                                                                                                                                                                                                                                                                                                                                                                                                                                                                                                                                                                                  |
| <b>Abstract:</b>              | <p><b>Introduction:</b> Practice assistants represent a highly relevant occupational group in Germany and one of the most popular training professions in Germany. Despite this, most research in the health care sector has focused on secondary care settings, but has not addressed practice assistants in primary care. Knowledge about practice assistants' workplace-related stressors and resources is particularly scarce. This cross-sectional study addresses the mental workload of practice assistants working in primary care practices.</p> <p><b>Methods:</b> Practice assistants from a network of 185 German primary care practices were invited to participate in this cross-sectional study. The standardized 'Short Questionnaire for Workplace Analysis' (German: Kurzfragebogen zur Arbeitsanalyse) was used to assess practice assistants' mental workload. It addresses eleven workplace factors in 26 items: versatility, completeness of task, scope of action, social support, cooperation, qualitative work demands, quantitative work demands, work disruptions, workplace environment, information and participation, and benefits. Sociodemographic and work characteristics were also obtained. A descriptive analysis was performed for sociodemographic data and "Short Questionnaire for Workplace Analysis" factors. The one-sided t-test and Cohen's d were calculated for a comparison with data from 23 professional groups (n=8,121).</p> <p><b>Results:</b> A total of 550 practice assistants from 130 practices participated. The majority of practice assistants was female (98.5%) and worked full-time (64.5%) in group practices (50.2%). Compared to the other professional groups, practice assistants reported higher values for the factor social support (4.0 versus 3.7 [d 0.44; p&lt;0.001]), information and participation (3.6 versus 3.3 [d 0.38; p&lt;0.001]) as well as work disruptions (2.7 vs. 2.4 [d 0.42; p&lt;0.001]), while practice assistants showed lower values regarding scope of action (3.4 versus 3.8 [d 0.43; p&lt;0.001]).</p> <p><b>Conclusions:</b> Our study identified social support and participation within primary care practices as protective factors for mental workload, while work disruptions and scope of action were perceived as stressors.</p> |
| <b>Order of Authors:</b>      | Jan Hoffmann<br>Christine Kersting<br>Birgitta Weltermann                                                                                                                                                                                                                                                                                                                                                                                                                                                                                                                                                                                                                                                                                                                                                                                                                                                                                                                                                                                                                                                                                                                                                                                                                                                                                                                                                                                                                                                                                                                                                                                                                                                                                                                                                                                                                                                                                                                                                                                                                                                                                                                                                                                                                                                                                    |
| <b>Response to Reviewers:</b> | <p>Journal Requirements:</p> <p>When submitting your revision, we need you to address these additional requirements.<br/>1. Please ensure that your manuscript meets PLOS ONE's style requirements, including those for file naming. The PLOS ONE style templates can be found at <a href="https://journals.plos.org/plosone/s/file?id=wjVg/PLOOne_formatting_sample_main_body.pdf">https://journals.plos.org/plosone/s/file?id=wjVg/PLOOne_formatting_sample_main_body.pdf</a> and <a href="https://journals.plos.org/plosone/s/file?id=ba62/PLOOne_formatting_sample_title_aut">https://journals.plos.org/plosone/s/file?id=ba62/PLOOne_formatting_sample_title_aut</a></p>                                                                                                                                                                                                                                                                                                                                                                                                                                                                                                                                                                                                                                                                                                                                                                                                                                                                                                                                                                                                                                                                                                                                                                                                                                                                                                                                                                                                                                                                                                                                                                                                                                                                |

hors\_affiliations.pdf

Answer: Our manuscript now meets all style requirements.

2. We suggest you thoroughly copyedit your manuscript for language usage, spelling, and grammar. If you do not know anyone who can help you do this, you may wish to consider employing a professional scientific editing service.

Whilst you may use any professional scientific editing service of your choice, PLOS has partnered with both American Journal Experts (AJE) and Editage to provide discounted services to PLOS authors. Both organizations have experience helping authors meet PLOS guidelines and can provide language editing, translation, manuscript formatting, and figure formatting to ensure your manuscript meets our submission guidelines. To take advantage of our partnership with AJE, visit the AJE website (<http://learn.aje.com/plos/>) for a 15% discount off AJE services. To take advantage of our partnership with Editage, visit the Editage website ([www.editage.com](http://www.editage.com)) and enter referral code PLOSEEDIT for a 15% discount off Editage services. If the PLOS editorial team finds any language issues in text that either AJE or Editage has edited, the service provider will re-edit the text for free.

Upon resubmission, please provide the following:

- a) The name of the colleague or the details of the professional service that edited your manuscript
- b) A copy of your manuscript showing your changes by either highlighting them or using track changes (uploaded as a \*supporting information\* file)
- c) A clean copy of the edited manuscript (uploaded as the new \*manuscript\* file)

Answer: The manuscript was proofread by a professional medical translator (Sarah Chalmers; <https://www.medi-translate.com/>)

3. We note that you have indicated that data from this study are available upon request. PLOS only allows data to be available upon request if there are legal or ethical restrictions on sharing data publicly. For information on unacceptable data access restrictions, please see <http://journals.plos.org/plosone/s/data-availability#loc-unacceptable-data-access-restrictions>.

In your revised cover letter, please address the following prompts:

- a) If there are ethical or legal restrictions on sharing a de-identified data set, please explain them in detail (e.g., data contain potentially identifying or sensitive patient information) and who has imposed them (e.g., an ethics committee). Please also provide contact information for a data access committee, ethics committee, or other institutional body to which data requests may be sent.
- b) If there are no restrictions, please upload the minimal anonymized data set necessary to replicate your study findings as either Supporting Information files or to a stable, public repository and provide us with the relevant URLs, DOIs, or accession numbers. Please see <http://www.bmj.com/content/340/bmj.c181.long> for guidelines on how to de-identify and prepare clinical data for publication. For a list of acceptable repositories, please see <http://journals.plos.org/plosone/s/data-availability#loc-recommended-repositories>.

We will update your Data Availability statement on your behalf to reflect the information you provide.

Answer: The data cannot be shared publicly because of ethical restrictions and data protection issues as our dataset includes potentially identifying information.

4. Please ensure that you refer to Figure 1 in your text as, if accepted, production will need this reference to link the reader to the figure.

Answer: A reference to Figure 1 is now included (line 208).

“As illustrated in Fig 1, the comparison of our results with data from Nolting et al. [8] revealed statistically significant differences ( $p < 0.05$ ) for the following factors: versatility (3.6 vs. 3.8), completeness of task (3.5 vs. 3.6), scope of action (3.4 vs. 3.8), social support (4.0 vs. 3.7), cooperation (3.6 vs. 3.4), qualitative work demands (2.2 vs. 2.1), works disruptions (2.7 vs. 2.4), information and participation (3.6 vs. 3.3), and benefits (2.9 vs. 2.4).”

5. We note you have included a table to which you do not refer in the text of your manuscript. Please ensure that you refer to Table 4 in your text; if accepted, production will need this reference to link the reader to the Table.

Answer: A reference to Table 4 is now included (line 221).

“Table 4 shows a comparison of PrAs in our study population (from 2014) and the comparative study population (from 2000).”

[Note: HTML markup is below. Please do not edit.]

Reviewers' comments:

Reviewer's Responses to Questions  
Comments to the Author

1. Is the manuscript technically sound, and do the data support the conclusions?

The manuscript must describe a technically sound piece of scientific research with data that supports the conclusions. Experiments must have been conducted rigorously, with appropriate controls, replication, and sample sizes. The conclusions must be drawn appropriately based on the data presented.

Reviewer #1: Yes

2. Has the statistical analysis been performed appropriately and rigorously?

Reviewer #1: Yes

3. Have the authors made all data underlying the findings in their manuscript fully available?

The PLOS Data policy requires authors to make all data underlying the findings described in their manuscript fully available without restriction, with rare exception (please refer to the Data Availability Statement in the manuscript PDF file). The data should be provided as part of the manuscript or its supporting information, or deposited to a public repository. For example, in addition to summary statistics, the data points behind means, medians and variance measures should be available. If there are restrictions on publicly sharing data—e.g. participant privacy or use of data from a third party—those must be specified.

Reviewer #1: No

Answer: The data cannot be shared publicly because of ethical restrictions and data protection issues as our dataset includes potentially identifying information.

4. Is the manuscript presented in an intelligible fashion and written in standard English?

PLOS ONE does not copyedit accepted manuscripts, so the language in submitted articles must be clear, correct, and unambiguous. Any typographical or grammatical errors should be corrected at revision, so please note any specific errors here.

Reviewer #1: No

Answer: The manuscript was proofread by a certified medical translator.

5. Review Comments to the Author

Please use the space provided to explain your answers to the questions above. You may also include additional comments for the author, including concerns about dual publication, research ethics, or publication ethics. (Please upload your review as an attachment if it exceeds 20,000 characters)

Reviewer #1:

1. The manuscript is full of typography errors; punctuations.

Answer: The manuscript was proofread by a professional medical translator.

|                                                                                                                                                                                                                                                                                                                          |                                                                                                                                                                                                                                                                                                                                                                                                                                                                                                                                                                                                                                                                                                                                                                                                                                                                                                                                                                                                                                                                                                                                                                                                                                                                                                                                                                                                                                                                                                                                                                                                                                                                                                                                                                                                                                                                                            |
|--------------------------------------------------------------------------------------------------------------------------------------------------------------------------------------------------------------------------------------------------------------------------------------------------------------------------|--------------------------------------------------------------------------------------------------------------------------------------------------------------------------------------------------------------------------------------------------------------------------------------------------------------------------------------------------------------------------------------------------------------------------------------------------------------------------------------------------------------------------------------------------------------------------------------------------------------------------------------------------------------------------------------------------------------------------------------------------------------------------------------------------------------------------------------------------------------------------------------------------------------------------------------------------------------------------------------------------------------------------------------------------------------------------------------------------------------------------------------------------------------------------------------------------------------------------------------------------------------------------------------------------------------------------------------------------------------------------------------------------------------------------------------------------------------------------------------------------------------------------------------------------------------------------------------------------------------------------------------------------------------------------------------------------------------------------------------------------------------------------------------------------------------------------------------------------------------------------------------------|
|                                                                                                                                                                                                                                                                                                                          | <p>2. Language is main problem<br/>Answer: The manuscript was proofread by a professional medical translator.</p> <p>3. Not consistent throughout the document<br/>Answer: The manuscript was proofread by a professional medical translator.</p> <p>4. Don't use abbreviation in the abstract part<br/>Answer: This was corrected.</p> <p>5. In the background part there are incomplete sentences<br/>Answer: This was corrected.</p> <p>6. In tables the decimal places should be consistent<br/>Answer: This was corrected in Tables 1, 2,3 and 4.</p> <p>7. In the table reporting missing value is not necessary<br/>Answer: This was corrected in Tables 1 and 2.</p> <p>6. PLOS authors have the option to publish the peer review history of their article (what does this mean?). If published, this will include your full peer review and any attached files.</p> <p>If you choose "no", your identity will remain anonymous but your review may still be made public.</p> <p>Do you want your identity to be public for this peer review? For information about this choice, including consent withdrawal, please see our Privacy Policy.<br/>Reviewer #1: No</p> <p>Answer to reviewer comment concerning response rate</p> <p>Reviewer comment: "Statistically how it can be generalized with around 30% non-response rate?"</p> <p>Answer: The argument in our sentence was incorrect. The total study had a response rate of 70% of practices. Within the practices, nearly all physicians and practice assistants participated indicating a high interest in the topic.</p> <p>The text was revised to: It is a strength of our study that it was based on a data set with a large number of participants (550 PrAs). Also, prior analyses had shown that the practice network from which this sample was taken is representative for German primary care practices.</p> |
| <b>Additional Information:</b>                                                                                                                                                                                                                                                                                           |                                                                                                                                                                                                                                                                                                                                                                                                                                                                                                                                                                                                                                                                                                                                                                                                                                                                                                                                                                                                                                                                                                                                                                                                                                                                                                                                                                                                                                                                                                                                                                                                                                                                                                                                                                                                                                                                                            |
| <b>Question</b>                                                                                                                                                                                                                                                                                                          | <b>Response</b>                                                                                                                                                                                                                                                                                                                                                                                                                                                                                                                                                                                                                                                                                                                                                                                                                                                                                                                                                                                                                                                                                                                                                                                                                                                                                                                                                                                                                                                                                                                                                                                                                                                                                                                                                                                                                                                                            |
| <p><b>Financial Disclosure</b></p> <p>Enter a financial disclosure statement that describes the sources of funding for the work included in this submission. Review the <a href="#">submission guidelines</a> for detailed requirements. View published research articles from <a href="#">PLOS ONE</a> for specific</p> | <p>Funding for this study was provided by the Ministry of Culture and Science, North-Rhine Westphalia, Germany, formerly the Ministry of Innovation, Science and Research, North-Rhine Westphalia, Germany. <a href="https://www.mkw.nrw/">https://www.mkw.nrw/</a>. The funders had no role in study design, data collection and analysis, decision to publish, or preparation of the manuscript.</p>                                                                                                                                                                                                                                                                                                                                                                                                                                                                                                                                                                                                                                                                                                                                                                                                                                                                                                                                                                                                                                                                                                                                                                                                                                                                                                                                                                                                                                                                                     |

examples.

This statement is required for submission and **will appear in the published article** if the submission is accepted. Please make sure it is accurate.

#### Unfunded studies

Enter: *The author(s) received no specific funding for this work.*

#### Funded studies

Enter a statement with the following details:

- Initials of the authors who received each award
- Grant numbers awarded to each author
- The full name of each funder
- URL of each funder website
- Did the sponsors or funders play any role in the study design, data collection and analysis, decision to publish, or preparation of the manuscript?
- **NO** - Include this sentence at the end of your statement: *The funders had no role in study design, data collection and analysis, decision to publish, or preparation of the manuscript.*
- **YES** - Specify the role(s) played.

\* typeset

#### Competing Interests

Use the instructions below to enter a competing interest statement for this submission. On behalf of all authors, disclose any [competing interests](#) that could be perceived to bias this work—acknowledging all financial support and any other relevant financial or non-financial competing interests.

This statement **will appear in the published article** if the submission is accepted. Please make sure it is accurate. View published research articles from [PLOS ONE](#) for specific examples.

The authors have declared that no competing interests exist.

**NO authors have competing interests**

Enter: *The authors have declared that no competing interests exist.*

**Authors with competing interests**

Enter competing interest details beginning with this statement:

*I have read the journal's policy and the authors of this manuscript have the following competing interests: [insert competing interests here]*

\* typeset

**Ethics Statement**

Enter an ethics statement for this submission. This statement is required if the study involved:

- Human participants
- Human specimens or tissue
- Vertebrate animals or cephalopods
- Vertebrate embryos or tissues
- Field research

Write "N/A" if the submission does not require an ethics statement.

General guidance is provided below. Consult the [submission guidelines](#) for detailed instructions. **Make sure that all information entered here is included in the Methods section of the manuscript.**

Ethical approval had been obtained from the Ethics Committee of the Medical Faculty of the University of Duisburg-Essen (reference number: 13-5536-BO, date of approval: 24/11/2014). All participants received written information and signed informed consent forms.

**Format for specific study types**

**Human Subject Research (involving human participants and/or tissue)**

- Give the name of the institutional review board or ethics committee that approved the study
- Include the approval number and/or a statement indicating approval of this research
- Indicate the form of consent obtained (written/oral) or the reason that consent was not obtained (e.g. the data were analyzed anonymously)

**Animal Research (involving vertebrate animals, embryos or tissues)**

- Provide the name of the Institutional Animal Care and Use Committee (IACUC) or other relevant ethics board that reviewed the study protocol, and indicate whether they approved this research or granted a formal waiver of ethical approval
- Include an approval number if one was obtained
- If the study involved *non-human primates*, add *additional details* about animal welfare and steps taken to ameliorate suffering
- If anesthesia, euthanasia, or any kind of animal sacrifice is part of the study, include briefly which substances and/or methods were applied

**Field Research**

Include the following details if this study involves the collection of plant, animal, or other materials from a natural setting:

- Field permit number
- Name of the institution or relevant body that granted permission

**Data Availability**

Authors are required to make all data underlying the findings described fully available, without restriction, and from the time of publication. PLOS allows rare exceptions to address legal and ethical concerns. See the [PLOS Data Policy](#) and [FAQ](#) for detailed information.

No - some restrictions will apply

A Data Availability Statement describing where the data can be found is required at submission. Your answers to this question constitute the Data Availability Statement and **will be published in the article**, if accepted.

**Important:** Stating 'data available on request from the author' is not sufficient. If your data are only available upon request, select 'No' for the first question and explain your exceptional situation in the text box.

Do the authors confirm that all data underlying the findings described in their manuscript are fully available without restriction?

**Describe where the data may be found in full sentences. If you are copying our sample text, replace any instances of XXX with the appropriate details.**

- If the data are **held or will be held in a public repository**, include URLs, accession numbers or DOIs. If this information will only be available after acceptance, indicate this by ticking the box below. For example: *All XXX files are available from the XXX database (accession number(s) XXX, XXX).*
- If the data are all contained **within the manuscript and/or Supporting Information files**, enter the following: *All relevant data are within the manuscript and its Supporting Information files.*
- If neither of these applies but you are able to provide **details of access elsewhere**, with or without limitations, please do so. For example:

*Data cannot be shared publicly because of [XXX]. Data are available from the XXX Institutional Data Access / Ethics Committee (contact via XXX) for researchers who meet the criteria for access to confidential data.*

*The data underlying the results presented in the study are available from (include the name of the third party*

Data cannot be shared publicly because Ethical restrictions have been imposed on the data underlying this study by the Ethics Committee of the Medical Faculty of the University of Duisburg-Essen in order to protect participant confidentiality. However, requests for an ethically compliant dataset may be made to the Ethics Committee of the Medical Faculty of the University of Duisburg-Essen (ethikkommission@uk-essen.de).



|                                                                                                                                                                                                                                         |  |
|-----------------------------------------------------------------------------------------------------------------------------------------------------------------------------------------------------------------------------------------|--|
| <p><i>and contact information or URL).</i></p> <ul style="list-style-type: none"><li>• This text is appropriate if the data are owned by a third party and authors do not have permission to share the data.</li></ul> <p>* typeset</p> |  |
| Additional data availability information:                                                                                                                                                                                               |  |

1 **Practice assistants' perceived mental workload: A cross-sectional study with 550 German**  
2 **participants addressing work content, stressors, resources, and organizational structure**

3 Jan Hoffmann<sup>1, #a\*</sup>, Christine Kersting<sup>2, #b</sup>, Birgitta Weltermann<sup>1</sup>

4

5 <sup>1</sup> Institute of General Practice and Family Medicine, University Hospital of Bonn, Bonn, Germany

6 <sup>2</sup> Institute for General Medicine, University Hospital Essen, University of Duisburg-Essen, Essen,  
7 Germany

8 <sup>#a</sup> Current Address: Institute of Medical Sociology, Health Services Research and Rehabilitation Science,  
9 University of Cologne, Cologne, Germany

10 <sup>#b</sup> Current Address: Chair for Innovation and Collaboration in Ambulatory Health Care, Faculty of  
11 Health/School of Medicine, Witten/Herdecke University, Witten, Germany

12

13 \* Corresponding author

14 E-mail: jan.hoffmann@uk-koeln.de (JH)

15

16

17

18

19

20

21

## 22 **Abstract**

23 **Introduction:** Practice assistants represent a highly relevant occupational group in Germany and one  
24 of the most popular training professions in Germany. Despite this, most research in the health care  
25 sector has focused on secondary care settings, but has not addressed practice assistants in primary  
26 care. Knowledge about practice assistants' workplace-related stressors and resources is particularly  
27 scarce. This cross-sectional study addresses the mental workload of practice assistants working in  
28 primary care practices.

29 **Methods:** Practice assistants from a network of 185 German primary care practices were invited to  
30 participate in this cross-sectional study. The standardized 'Short Questionnaire for Workplace Analysis'  
31 (German: Kurzfragebogen zur Arbeitsanalyse) was used to assess practice assistants' mental workload.  
32 It addresses eleven workplace factors in 26 items: versatility, completeness of task, scope of action,  
33 social support, cooperation, qualitative work demands, quantitative work demands, work disruptions,  
34 workplace environment, information and participation, and benefits. Sociodemographic and work  
35 characteristics were also obtained. A descriptive analysis was performed for sociodemographic data  
36 and "Short Questionnaire for Workplace Analysis" factors. The one-sided t-test and Cohen's d were  
37 calculated for a comparison with data from 23 professional groups (n=8,121).

38 **Results:** A total of 550 practice assistants from 130 practices participated. The majority of practice  
39 assistants was female (98.5%) and worked full-time (64.5%) in group practices (50.2%). Compared to  
40 the other professional groups, practice assistants reported higher values for the factor social support  
41 (4.0 versus 3.7 [d 0.44; p<0.001]), information and participation (3.6 versus 3.3 [d 0.38; p<0.001] as  
42 well as work disruptions (2.7 vs. 2.4 [d 0.42; p<0.001]), while practice assistants showed lower values  
43 regarding scope of action (3.4 versus 3.8 [d 0.43; p<0.001]).

44 **Conclusions:** Our study identified social support and participation within primary care practices as  
45 protective factors for mental workload, while work disruptions and scope of action were perceived as  
46 stressors.

47 Keywords: practice assistants, primary care, mental workload, psychosocial risk assessment, workplace  
48 characteristics

## 49 **Introduction**

50 Practice assistants (PrAs) represent the largest group of employees in the German outpatient health  
51 care sector [1] and the second most popular training profession among German women [2]. However,  
52 little is known about how PrAs perceive their work conditions. More specifically, data on the  
53 relationship between work and psychological stress in PrAs are lacking. While psychosocial assessment  
54 studies of health personnel in secondary care have been performed [3–6], only few have addressed  
55 this issue in PrAs in German primary care [1,7,8]. Therefore, it is important to further investigate PrAs'  
56 perceived level of psychological stress, as psychological strain may not only threaten PrAs' health with  
57 potentially tremendous economic costs, but may also impair high-quality patient care [9].

58 In recent years, increasing attention has been devoted to employees' mental health. A systematic  
59 review by Theorell et al. highlighted that job strain has an impact on the development of depressive  
60 symptoms [10]. Also, the socio-economic implications are increasingly evident: preceded only by  
61 musculoskeletal diseases, mental health conditions rank second with 16.7% of all sick leaves among  
62 German employees [11] and caused a damage of 21.7 billion Euros gross added value in 2017 [11].

63 The stress-strain model developed by Rohmert and Rutenfranz in 1975 differentiates between the  
64 terms 'psychological stress' and 'psychological strain'. 'Psychological stress' describes all external  
65 factors that influence one's psychological well-being. When referring to psychological stress in a work  
66 environment, the term 'mental workload' refers to employees' exposure to individual work demands  
67 and the environment at work [12]. However, the term does not necessarily have a negative  
68 connotation [13]. 'Psychological strain' can be understood as an individual's response to psychological  
69 stress. Thus, the same level of psychological stress may elicit a different level of psychological strain  
70 depending on an employee's coping strategy and constitution [14]. A well-balanced amount of  
71 psychological strain can lead to a healthy and productive workflow [12], while an extreme level of

72 psychological strain may threaten employees' health. Studies have shown a negative association  
73 between high levels of psychological strain and mental illness [15,16].

74 Since 2014, the German Safety and Health at Work Act (ArbSchG) obliges employers to perform a  
75 general risk assessment of their employees' work conditions [17]. Assessing the mental workload (a  
76 so-called 'psychosocial risk assessment') is part of this risk assessment. Based on the results, employers  
77 must take countermeasures as necessary to enhance their employees' health [18]. Due to differences  
78 in work demands, work hazards, and work environments across professions there is no gold standard  
79 that defines what instrument should be used for the psychosocial risk assessment. While different  
80 instruments exist [19], the so-called Kurzfragebogen zur Arbeitsanalyse (KFZA; English: Short  
81 Questionnaire for Workplace Analysis), a questionnaire addressing perceived workload, is widely used  
82 across professions [20]. Data from more than 8,000 participants from 23 professions are available [8].

83 The aims of this cross-sectional study are threefold: i) to assess the mental workload of PrAs working  
84 in German primary care practices, ii) to identify resources and stressors, and iii) to compare results  
85 with aggregated data from 23 different professions.

## 86 **Material and Methods**

### 87 **Study design and recruitment of participants**

88 The psychosocial assessment of PrAs reported in this paper was obtained as part of a larger cross-  
89 sectional study investigating multiple aspects of stress in primary care practices. Details of the study  
90 are reported elsewhere [21,22]. Briefly, general practitioners (GPs) and PrAs of the 185 general  
91 medicine practices of the practice network of the Institute for General Medicine, University Hospital  
92 Essen, Essen, Germany, were asked to participate in the study. The practices were located in urban  
93 and rural regions of North Rhine-Westphalia (Western Germany) with an average distance of 30 km  
94 (range: 2±180 km) to the Institute. In a prior study it was shown that the practices affiliated with the  
95 network are representative for German primary care practices [23]. Practices had been invited by mail

96 and contacted by phone for further recruitment. Those refusing to participate were asked to answer a  
97 short questionnaire on practice characteristics and to provide reasons for non-participation. Data were  
98 collected between April and September 2014 during on-site visits. Within each practice, all GPs  
99 (practice owners and employed physicians) and PrAs including medical secretaries and PrA trainees  
100 were eligible for participation and received the study documents. The study documents comprised a  
101 study information sheet, an informed consent form to be completed by all participants, and a set of  
102 questionnaires which included sociodemographic questions and the KFZA analyzed in this paper. To  
103 ensure data protection, participants were asked to seal the completed questionnaire in an envelope.  
104 As an incentive, practice teams received a department store chain voucher of 5 euros per person,  
105 irrespective of the participation of individual team members. In addition, the dataset contained  
106 information about the practices' location from the practice network's database and matched with  
107 public regional data for the population size in 2012 ([www.it.nrw.de](http://www.it.nrw.de)). This paper follows the STROBE  
108 recommendations for reporting cross-sectional studies [24].  
109 Ethical approval had been obtained from the Ethics Committee of the Medical Faculty of the University  
110 of Duisburg-Essen (reference number: 13-5536-BO, date of approval: 24/11/2014). All participants  
111 received written information and signed informed consent forms.

## 112 **Study instrument to assess mental workload**

113 The KFZA was developed by Prümper et al. in 1995 and is as a widely accepted screening tool for  
114 psychological stress at the workplace [25]. The questionnaire is a standardized instrument with closed  
115 questions. It is completed by the employees themselves and thus provides a subjective view of each  
116 individual's perception of the work environment. According to DIN EN ISO 10075 "Ergonomic principles  
117 related to mental workload", the instrument is categorized as a "precision level 2 process for overview  
118 purposes" [26]. The instrument is listed in the toolbox for "Instruments for recording mental loads" of  
119 the Federal Institute for Occupational Safety and Health and covers multiple aspects of the work  
120 environment [27]. It includes four dimensions: *work content, resources, stressors, and organizational*  
121 *culture*. Dimensions consist of 11 factors which are derived from 26 single items with answer options

122 on a Likert scale ranging from 1 (does not apply at all) to 5 (is completely true). *Work content* contains  
123 two factors (versatility, completeness of task) and five single items (learning new skills, use of  
124 knowledge, skills and ability, variety of tasks, visibility of task accomplishment, completeness of  
125 product). *Resources* contains three factors (scope of action, social support, cooperation) and nine  
126 single items (influence on sequence of activities, influence on work content, influence on workload  
127 and procedures, social support by co-workers, social support by supervisors, social cohesion within the  
128 department, necessity of cooperation, opportunity for social exchange with co-workers, feedback from  
129 supervisors and co-workers). *Stressors* contains four factors (qualitative work demands, quantitative  
130 work demands, work disruptions, workplace environment) and eight single items (excessive  
131 complexity of tasks, excessive demands on concentration, frequent work under time pressure, too  
132 much work to do, lack of information, work materials or equipment, interruptions of workflow,  
133 unfavorable physicochemical conditions, insufficient workspace and equipment). *Organizational*  
134 *culture* contains two factors (information and participation, benefits) and four single items  
135 (information about organizational developments, consideration of employee input, continuous  
136 education, opportunities for advancement). The dimensions job content, resources, and organizational  
137 culture represent positive aspects, and high scores are considered positive. High scores in the stressors  
138 dimension are considered negative work aspects.

139 Given the time constraints in primary care practices, the KFZA was deemed suitable as it takes only  
140 10 minutes to complete. Also, data from more than 8,000 participants from 23 other professional  
141 groups are available for comparison [25]. The questionnaire can be applied throughout all professions  
142 and workspaces and is readily available for academic use [28].

## 143 **Comparative data from 23 professional groups**

144 In 2000, the Employers' Liability Insurance Association for Medical Services and Welfare Work (BGW)  
145 in cooperation with the German Employees' Health Insurance (DAK) conducted a cross-sectional study  
146 to measure stress at work [8]. A purposive sample of 27,584 employees from 23 professional groups

147 was selected from the BGW and DAK register: physicians, assistant pharmacists, pharmacists, office  
148 workers, teacher, hairdressers, pest controllers, alternative practitioners, unskilled laborers,  
149 kindergarten teachers, chefs, nurses, masseurs, medical laboratory technicians, porters, facility  
150 cleaners, social workers, PrAs, veterinarians, care workers for persons at risk, employees of dialysis  
151 centers, and employees of workshops for the disabled. A total of 8,121 employees participated in the  
152 study in the context of a project called 'Prevention of work-related health hazards'. The KFZA was used  
153 within the scope of the study. We performed two comparative analyses using published data of the  
154 survey: first, we compared KFZA results from the study of the 23 professional groups with results from  
155 our population. Second, we compared the results for the subpopulation of PrAs from the study with  
156 results from our population. The latter comparison is particularly interesting, as it provides a  
157 longitudinal approach (data from 2000 and 2014) in a situation where the vocational training was  
158 meanwhile been revised and PrAs in Germany are professionalizing.

## 159 **Data analysis**

160 The analysis was performed using IBM SPSS Statistics for Windows, Version 25 (Armonk, NY: IBM  
161 Corp.). Data of all PrAs were analyzed. Missing data are reported for all items. Non-plausible values  
162 were recoded as missing values.

163 Sociodemographic and work-related characteristics were analyzed descriptively. The mean, standard  
164 deviation (SD), median, and range are reported for metric sociodemographic and work variables. The  
165 practices' population size was categorized into rural, small, medium-sized, and big cities following  
166 categorization schemes of the Federal Institute for Research on Building, Urban Affairs and Spatial  
167 Development (rural  $\leq 4,999$  inhabitants, small city 5000-19,999, medium-sized city 20,000-99,999,  
168 big city  $\geq 100,000$ ).

169 Following Prümper et al., the results of the KFZA were evaluated by computing mean values on a factor  
170 level [25,29]: As a first overview, positive items  $<3$  and negative items  $>3$  are interpreted as high levels  
171 of psychological stress and indicate a need for more detailed analyses. In addition, the comparison



172 with data from other professional groups or from the same professional group provides information  
173 on how to set a benchmark against other results [29]. Differences between the means of our  
174 population and the comparative population were analyzed using a one-sided t-test (95% significance  
175 level; 0.05 = alpha). Additionally, Cohen's d was calculated to estimate the effect size. 95% confidence  
176 intervals (CI) were calculated for factors of the 2014 PrA population.

## 177 **Results**

### 178 **Study characteristics**

179  PrAs participated in the study (response rate 70.3%; n=130 practices). There were four implausible  
180 values that were recoded as missing values. The sociodemographic characteristics of the participants  
181 are presented in Table 1. PrAs had a mean age of 37.97 years (SD: 12.63), with 98.55% of PrAs being  
182 female. The majority of PrAs was married (50.36%), worked full-time (64.55%) on a permanent  
183 contract (84.55%) with a median work experience of 18 years (range: 0-49 years). Most (61.45%) PrAs  
184 worked 20-39 hours a week, while 24.91% of PrAs worked more than 39 hours. Most PrAs (90.73%)  
185 had completed a three-year vocational training as "Medizinische Fachangestellte" or "Arzthelferin"  
186 which combines practical training (3 days per week) and vocational training (2 days per week). Eleven  
187 percent had other backgrounds (i.e.: secretary, practice aid, other practice employee). Almost all PrAs  
188 had completed some sort of additional training: 22.4% of PrAs had completed additional training as  
189 VERAHs (106 hours of theoretical and 94 hours of practical training) or EVAs (170 to 220 hours of  
190 theoretical training and 20 to 50 hours of practical training depending on prior work experience) that  
191 allows PrAs to perform additional tasks (e.g.: home visits). On average, PrAs worked in practices with  
192 2.96 (SD 2.15) physicians and 7.73 (SD 7.64) PrAs. Half of the practices (50.18%) were group practices.  
193 The smallest proportion of PrAs worked in practices with a low patient load per quarter (5.45%, 501-  
194 1000 patients per quarter), while the largest proportion of PrAs worked in practices with a high patient  
195 load per quarter (27.27%, >3001 patients per quarter). PrAs' work setting characteristics are presented  
196 in Table 2.

**Table 1. Practice assistants' sociodemographic and professional training characteristics (n=550).**

| Variable                              | Total (n=550) | 100%*   |
|---------------------------------------|---------------|---------|
| <b>Age (n=550, years)</b>             |               |         |
| [Mean (SD)]                           | 37.97         | 0.63    |
| [Median (min-max)]                    | 38            | (16-71) |
| <b>Gender (n, %)</b>                  |               |         |
| Female                                | 542           | 98.55   |
| Male                                  | 4             | 0.73    |
| <b>Marital status (n, %)</b>          |               |         |
| Single                                | 218           | 39.63   |
| Married                               | 277           | 50.36   |
| Divorced                              | 45            | 8.18    |
| Widowed                               | 7             | 1.27    |
| <b>Status of employment (n, %)</b>    |               |         |
| Full-time                             | 355           | 64.55   |
| Part-time                             | 179           | 32.55   |
| <b>Mode of employment (n, %)</b>      |               |         |
| Fixed-term                            | 56            | 10.18   |
| Permanent                             | 465           | 84.55   |
| <b>Working hours per week (n, %)</b>  |               |         |
| 0-19                                  | 65            | 11.82   |
| 20-39                                 | 338           | 61.45   |
| 40-59                                 | 127           | 23.09   |
| >60                                   | 10            | 1.82    |
| <b>Work experience (n=550, years)</b> |               |         |
| [Mean (SD)]                           | 18.74         | (12,46) |
| [Median (Min-Max)]                    | 18            | (0-49)  |
| <b>PrA in training (n, %)</b>         |               |         |

|                                                |     |       |
|------------------------------------------------|-----|-------|
| Yes                                            | 49  | 8.91  |
| No                                             | 499 | 90.73 |
| <b>Year of training (n=51, %)</b>              |     |       |
| First year                                     | 16  | 31.37 |
| Second year                                    | 19  | 37.25 |
| Third year                                     | 12  | 23.53 |
| <b>Vocational training <sup>1</sup> (n, %)</b> |     |       |
| Practice assistants                            | 490 | 89.09 |
| Secretary                                      | 12  | 2.18  |
| Practice aid <sup>2</sup>                      | 6   | 1.09  |
| Other practice employees <sup>2</sup>          | 16  | 2.91  |
| Other                                          | 75  | 13.64 |
| <b>Additional training (n=137, %)</b>          |     |       |
| VERAH                                          | 14  | 10.22 |
| EVA                                            | 3   | 2.19  |
| VERAH/EVA + other                              | 8   | 5.84  |
| Other                                          | 105 | 76.64 |

198 <sup>1</sup> multiple answers possible, <sup>2</sup> no vocational training, numbers do not add up to 100% due to missing  
199 values

200 **Table 2. Practice assistants' work setting characteristics (n=550).**

| Variable                                     | Total (n=550) | 100%  |
|----------------------------------------------|---------------|-------|
| <b>Type of practice (n, %)</b>               |               |       |
| Solo practice                                | 147           | 26.73 |
| Group practice                               | 276           | 50.18 |
| Others                                       | 122           | 22.18 |
| <b>Number of patients per quarter (n, %)</b> |               |       |
| 501-1000                                     | 30            | 5.45  |

|           |     |       |
|-----------|-----|-------|
| 1001-1500 | 116 | 21.09 |
| 1501-2000 | 100 | 18.18 |
| 2001-2500 | 79  | 14.36 |
| 2501-3000 | 62  | 11.27 |
| >3001     | 150 | 27.27 |

**Location of practice<sup>1</sup> (n, %)**

|                   |     |       |
|-------------------|-----|-------|
| Small city        | 33  | 6.00  |
| Medium-sized city | 128 | 23.27 |
| Big city          | 371 | 67.45 |

**Number of physicians in practice**

[Mean (SD)] 2.96 (2.15)

[Median (Min-Max)] 2 (1-10)

**Number of PrAs in practice**

[Mean (SD)] 7.73 (7.64)

[Median (Min-Max)] 5 (0-35)

201 <sup>1</sup> based on 2012 number of inhabitants, numbers do not add up to 100% due to missing values

202 **Comparison of practice assistants with other professional groups**

203 **(comparative data)**

204 Table 3 shows the results of the KFZA analysis for PrAs and for the comparative population. For a first  
 205 overview of only results from our study population, the calculation of mean values for the factor-level  
 206 analysis yielded a critical score for the factor benefits (2.86 [SD 1.05]). In contrast, social support  
 207 showed the highest positive factor (4.05 [SD 0.79]).

208 As illustrated in Fig 1, the comparison of our results with data from Nolting et al. [8] revealed  
 209 statistically significant differences (p < 0.05) for the following factors: versatility (3.6 vs. 3.8),  
 210 completeness of task (3.5 vs. 3.6), scope of action (3.4 vs. 3.8), social support (4.0 vs. 3.7), cooperation  
 211 (3.6 vs. 3.4), qualitative work demands (2.2 vs. 2.1), work disruptions (2.7 vs. 2.4), information and

212 participation (3.6 vs. 3.3), and benefits (2.9 vs. 2.4). The two factors workplace environment (2.2 vs.  
213 2.2) and quantitative work demands (2.9 vs. 3.0) were found to be non-significant.

214 Effect size showed the strongest difference for the factors social support (4.0 vs 3.7 [d 0.44]), scope of  
215 action (3.4 vs. 3.8 [d 0.43]), and benefits (2.9 vs. 2.4 [d 0.43]). The scores for social support and benefits  
216 were higher in the PrA population than in the comparative group, whereas scope of action yielded  
217 lower scores. The factor benefits, on the other hand, was critically low in both populations. The  
218 difference in work disruptions (2.7 vs. 2.4 [d 0.41]) presented a moderate effect size. The score for  
219 work disruptions was higher in the PrA population compared to the population from Nolting et al. [8].

## 220 **Comparison of practice assistants from 2000 and 2014**

221 Table 4 shows the comparison between PrAs in our study population (from 2014) and the comparative  
222 study population (from 2000). The comparison yielded statistically significant differences ( $p < 0.05$ ) for  
223 the factors completeness of task (3.5 vs. 3.2), social support (4.0 vs. 3.9), cooperation (3.6 vs. 3.5),  
224 qualitative work demands (2.2 vs. 2.0), quantitative work demands (2.9 vs. 2.8), work disruptions (2.7  
225 vs. 2.5), workplace environment (2.2 vs. 2.0), information and participation (3.6 vs. 3.5), and benefits  
226 (2.9 vs 2.2).

227 Effect size showed no effect for versatility (d 0.05), scope of action (d 0.01), social support (d 0.19),  
228 cooperation (d 0.13), quantitative work demands (d 0.12), as well as information and participation  
229 (d 0.16). A small effect size was shown for completeness of task (d 0.32), qualitative work demands  
230 (d 0.25), work disruptions (d 0.29), and workplace environment (d 0.21). The difference in the factor  
231 benefits presented a moderate effect size (d 0.62).

232 **Table 3. KFZA results from our study of practice assistants (n=550) in comparison with comparative data from 23 professional groups (n= 8.121).**

| <b>Work aspects</b>                       | <b>KFZA factor</b>                   | <b>Our study</b>         | <b>95% CI</b> | <b>Comparison:</b>                 | <b>Cohen´s d</b> | <b>P-value **</b> |
|-------------------------------------------|--------------------------------------|--------------------------|---------------|------------------------------------|------------------|-------------------|
|                                           |                                      | <b>Mean score (PrAs)</b> |               | <b>Mean score (Nolting et al.)</b> |                  |                   |
| <b>Job content<sup>1</sup></b>            | <b>Versatility</b>                   | <b>3.6</b>               | 3.58 - 3.70   | 3.8                                | 0.23             | < 0.001           |
|                                           | <b>Completeness of task</b>          | <b>3.5</b>               | 3.41 - 3.57   | 3.6                                | 0.12             | 0.0045            |
| <b>Resources<sup>1</sup></b>              | <b>Scope of action</b>               | <b>3.4</b>               | 3.37 - 3.49   | 3.8                                | 0.43             | < 0.001           |
|                                           | <b>Social support</b>                | <b>4.0</b>               | 3.98 - 4.12   | 3.7                                | 0.44             | < 0.001           |
|                                           | <b>Cooperation</b>                   | <b>3.6</b>               | 3.53 - 3.66   | 3.4                                | 0.24             | < 0.001           |
| <b>Stressors<sup>2</sup></b>              | <b>Qualitative work demands</b>      | <b>2.2</b>               | 2.14 - 2.29   | 2.1                                | 0.13             | 0.0025            |
|                                           | <b>Quantitative work demands</b>     | <b>2.9</b>               | 2.83 - 3.01   | 3.0                                | 0.07             | 0.0797            |
|                                           | <b>Work disruptions</b>              | <b>2.7</b>               | 2.67 - 2.81   | 2.4                                | 0.41             | < 0.001           |
|                                           | <b>Workplace environment</b>         | <b>2.2</b>               | 2.13 - 2.30   | 2.2                                | 0.02             | 0.7109            |
| <b>Organizational culture<sup>1</sup></b> | <b>Information and participation</b> | <b>3.6</b>               | 3.57 - 3.73   | 3.3                                | 0.38             | < 0.001           |
|                                           | <b>Benefits</b>                      | <b>2.9*</b>              | 2.77 - 2.94   | 2.4*                               | 0.43             | < 0.001           |

233 <sup>1</sup> High scores (>3) are considered positive, <sup>2</sup> high scores (>3) are considered negative, \* critical values \*\* based on a one-sided t-test comparing mean values of

234 PrAs and Nolting et al. on a 95% significance level

235 **Fig 1. KFZA results on a factor level divided into resources and stressors in comparison with comparative data from Nolting et al.** <sup>1</sup> High scores (>3) are  
 236 considered positive, <sup>2</sup> high scores (>3) are considered negative.

237

238 **Table 4. KFZA factor-level comparison of PrAs from our study (n=550; year 2014) and PrAs from Nolting et al. (n=324; year 2000).**

| Work aspects                   | KFZA factor                      | Our study         | 95% CI      | PrAs' results from 2000           | Cohen's d | P-value |
|--------------------------------|----------------------------------|-------------------|-------------|-----------------------------------|-----------|---------|
|                                |                                  | Mean score (PrAs) |             | Mean score (PrAs; Nolting et al.) |           |         |
| <b>Job content<sup>1</sup></b> | <b>Versatility</b>               | <b>3.6</b>        | 3.58 - 3.70 | 3.6                               | 0.05      | 0.238   |
|                                | <b>Completeness of task</b>      | <b>3.5</b>        | 3.41 - 3.57 | 3.2                               | 0.32      | < 0.001 |
| <b>Resources<sup>1</sup></b>   | <b>Scope of action</b>           | <b>3.4</b>        | 3.37 - 3.49 | 3.4                               | 0.01      | 0.765   |
|                                | <b>Social support</b>            | <b>4.0</b>        | 3.98 - 4.12 | 3.9                               | 0.19      | < 0.001 |
|                                | <b>Cooperation</b>               | <b>3.6</b>        | 3.53 - 3.66 | 3.5                               | 0.13      | 0.006   |
| <b>Stressors<sup>2</sup></b>   | <b>Qualitative work demands</b>  | <b>2.2</b>        | 2.14 - 2.29 | 2.0                               | 0.25      | < 0.001 |
|                                | <b>Quantitative work demands</b> | <b>2.9</b>        | 2.83 - 3.01 | 2.8                               | 0.12      | 0.007   |
|                                | <b>Work disruptions</b>          | <b>2.7</b>        | 2.67 - 2.81 | 2.5                               | 0.29      | < 0.001 |
|                                | <b>Workplace environment</b>     | <b>2.2</b>        | 2.13 - 2.30 | 2.0                               | 0.21      | < 0.001 |

|                            |                                      |             |             |      |      |         |
|----------------------------|--------------------------------------|-------------|-------------|------|------|---------|
| <b>Organizational</b>      | <b>Information and participation</b> | <b>3.6</b>  | 3.57 - 3.73 | 3.5  | 0.16 | 0.002   |
| <b>culture<sup>1</sup></b> | <b>Benefits</b>                      | <b>2.9*</b> | 2.77 – 2.94 | 2.2* | 0.62 | < 0.001 |

239 <sup>1</sup> High scores (>3) are considered positive, <sup>2</sup> high scores (>3) are considered negative, \* critical values \*\* based on a one-sided t-test comparing mean values of

240 PrAs and Nolting et al. on a 95% significance level



## 241 **Discussion**

242 Our study identified social support within primary care practices as a resource and a protective factor  
243 for mental workload among PrAs, while the lack of benefits at work was perceived as a stressor.

244 When comparing data on PrAs with the aggregated data of other professional groups, we were able to  
245 perform a more informative analysis yielding slightly different results. Scope of action and work  
246 disruptions showed the largest negative difference and the strongest effect size, whereas social  
247 support and benefits showed the largest positive difference and the strongest effect size. Interestingly,  
248 when comparing with other professional groups, the factor benefits that was identified as a stressor  
249 in the single evaluation turned out to be a resource. Since the scores are rather low in both samples,  
250 lack of benefits at work might be a general problem, while PrAs might experience more benefits at  
251 work than other professional groups. PrAs in general practices tend to be responsible for a wide range  
252 of tasks in different workplaces throughout the practices, as they are the first point of contact for  
253 patients with unexpected events occurring on a regular basis [1]. This job profile may explain the high  
254 scores for work disruptions. Although PrAs are responsible for a wide range of tasks, GPs remain the  
255 decision makers, resulting in a setting-immanent limited scope of action for PrAs.

256 The comparison between the PrA groups from 2000 to 2014 revealed significant differences for most  
257 factors, but small effect sizes. The factor benefits showed a moderate effect size in favor of the 2014  
258 study population. All factors, positive factors and negative factors alike, were slightly higher in our  
259 population of PrAs compared to the 2000 PrA population from Nolting et al. The increase in benefits  
260 at work and completeness of task from 2000 to 2014 may be explained by the further training  
261 opportunities for PrAs that were introduced during that time period (i.e., VERAH, EVA). Among other  
262 changes, these trainings have enabled PrAs to carry out more complex work processes autonomously  
263 (e.g.: patient education on diabetes). Additionally, they are rewarded with a better salary. Both may  
264 be signs of professionalization. In a recent study by Vu-Eickmann et al., PrAs reported a high patient

265 volume, which in addition to handling many tasks at once may explain the high score for work  
266 disruptions [1].

267 Social support is an important resource and can positively influence job satisfaction, as shown in a  
268 recent study with Portuguese nursing staff [30]. Job satisfaction was again shown to positively  
269 correlate with patient satisfaction [31]. A systematic review yielded a similar result linking social  
270 support with staff well-being in emergency departments [32]. In contrast, studies have shown that  
271 negative work aspect (i.e.: lack of benefits, limited scope of action) cause psychological strain and can  
272 lead to a higher turnover rate and depressive symptoms [10,33].

273 In agreement with three other studies on this topic, we showed that PrAs in primary care practices  
274 receive high social support and have a rather limited scope of action and still insufficient benefits at  
275 work [1,7,8].

## 276 **Strengths and limitations**

277 It is a strength of our study that it was based on a data set with a large number of participants (550  
278 PrAs). Also, prior analyses had shown that the practice network from which this sample was taken is  
279 representative for German primary care practices [23]. Each participant received an incentive in the  
280 form of a 5-Euro voucher to avoid a selection bias by selecting only highly motivated PrAs. As the  
281 network is located in a rather densely populated area, our results may overrepresent PrAs working in  
282 urban areas. The KFZA proved to be a cost-effective screening tool to gain first insights into employees'  
283 psychological stressors and resources. To our knowledge this is the first study comparing PrAs' data  
284 from a psychological risk assessment in primary care with a large sample from other professions.

285 In our study we were only able to assess the current situation and not the state desired by PrAs, which  
286 could have provided even more insights. The comparison with data from 23 professional groups was  
287 limited as only aggregated mean results were available without standard deviations. Due to this, we  
288 were unable to calculate confidence intervals for both populations. A strength of our study is the

289 comparison of the results of the 2000 with the 2014 study from the same professional group. However,  
290 the PrA populations were not identical, and caution is advised when interpreting the results.

## 291 **Conclusions**

292 Mental well-being has a tremendous impact on preserving a healthy and productive workforce.  
293 Therefore, our goal must be to first identify risk factors for mental well-being at work and put them  
294 into perspective with other occupations, which we aimed to do in this study. Second, we need to  
295 develop measures to tackle risk factors for psychological strain at work and enhance protective factors  
296 such as social support, scope of action, benefits at work, and cooperation. Last, measures need to be  
297 evaluated and implemented in the everyday working life of PrAs.

## 298 **List of abbreviations**

299 CI: confidence interval; GP: general practitioner; KFZA: Kurzfragebogen zur Arbeitsanalyse (English:  
300 Short Questionnaire for Workplace Analysis); PrA: practice assistant; SD: standard deviation

## 301 **Acknowledgements**

302 We thank the Institute for General Medicine, University Hospital Essen, for supporting the  
303 conceptualization of the questionnaire, the data collection, and the provision of the data for this  
304 analysis.

## 305 **References**

- 306 1. Vu-Eickmann P, Loerbroks A. Psychosoziale Arbeitsbedingungen Medizinischer Fachangestellter:  
307 Ergebnisse einer qualitativen Studie zu den berufsspezifischen Belastungen, Ressourcen,  
308 Präventionsmöglichkeiten und Interventionsbedürfnissen. *Z Evid Fortbild Qual Gesundhwes.*  
309 2017; 126: 43–51. doi: 10.1016/j.zefq.2017.06.005.
- 310 2. Statistisches Bundesamt. Auszubildene. nach Ausbildungsberufen 2017 (TOP 20), Frauen.  
311 Available:  
312 <https://www.destatis.de/DE/ZahlenFakten/GesellschaftStaat/BildungForschungKultur/BeruflicheBildung/Tabellen/AzubiRangliste.html>. Accessed 12 March 2019.
- 313 3. Freimann T, Merisalu E. Work-related psychosocial risk factors and mental health problems  
314 amongst nurses at a university hospital in Estonia: a cross-sectional study. *Scand J Public Health.*  
315 2015; 43: 447–452. doi: 10.1177/1403494815579477.
- 316

- 317 4. Kern M, Buia A, Tonus C, Weigel TF, Dittmar R, Hanisch E, et al. Psychological stressors,  
318 resources and well-being of surgeons in Germany : A cross-sectional study. *Chirurg*. 2019.  
319 doi: 10.1007/s00104-018-0780-5.
- 320 5. Ulusoy N, Wirth T, Lincke H-J, Nienhaus A, Schablon A. Psychosocial burdens and strains in  
321 geriatric nursing: comparison of nursing personnel with and without migration background. *z*  
322 *Gerontol Geriatr*. 2018. doi: 10.1007/s00391-018-1414-8.
- 323 6. Wagner A, Rieger MA, Manser T, Sturm H, Hardt J, Martus P, et al. Healthcare professionals'  
324 perspectives on working conditions, leadership, and safety climate: a cross-sectional study. *BMC*  
325 *Health Serv Res*. 2019; 19: 53. doi: 10.1186/s12913-018-3862-7.
- 326 7. Goetz K, Berger S, Gavartina A, Zaroti S, Szecsenyi J. How psychosocial factors affect well-being  
327 of practice assistants at work in general medical care?--a questionnaire survey. *BMC Fam Pract*.  
328 2015; 16: 166. doi: 10.1186/s12875-015-0366-y.
- 329 8. Nolting H-D, Berger J, Niemann D, Genz HO, Kordt M. BGW-DAK Stress-Monitoring 2001.  
330 Überblick über die Ergebnisse einer BGW-DAK-Studie zum Zusammenhang von  
331 Arbeitsbedingungen und Stressbelastung in ausgewählten Berufen; 2001. Available:  
332 [http://people.f3.htw-berlin.de/Professoren/Pruemper/instrumente/KFZA-BGW-DAK-](http://people.f3.htw-berlin.de/Professoren/Pruemper/instrumente/KFZA-BGW-DAK-StressMonitoring_UEBERBLICK.pdf)  
333 [StressMonitoring\\_UEBERBLICK.pdf](http://people.f3.htw-berlin.de/Professoren/Pruemper/instrumente/KFZA-BGW-DAK-StressMonitoring_UEBERBLICK.pdf). Accessed 20 March 2019.
- 334 9. Paquet M, Courcy F, Lavoie-Tremblay M, Gagnon S, Maillet S. Psychosocial work environment  
335 and prediction of quality of care indicators in one Canadian health center. *Worldviews Evid*  
336 *Based Nurs*. 2013; 10: 82–94. doi: 10.1111/j.1741-6787.2012.00250.x.
- 337 10. Theorell T, Hammarstrom A, Aronsson G, Traskman Bendz L, Grape T, Hogstedt C, et al. A  
338 systematic review including meta-analysis of work environment and depressive symptoms. *BMC*  
339 *Public Health*. 2015. doi: 10.1186/s12889-015-1954-4.
- 340 11. Bundesanstalt für Arbeitsschutz und Arbeitsmedizin. Volkswirtschaftliche Kosten durch  
341 Arbeitsunfähigkeit 2017; 2019. Available: [https://www.baua.de/DE/Themen/Arbeitswelt-und-](https://www.baua.de/DE/Themen/Arbeitswelt-und-Arbeitsschutz-im-Wandel/Arbeitsweltberichterstattung/Kosten-der-AU/pdf/Kosten-2017.pdf?__blob=publicationFile&v=4)  
342 [Arbeitsweltberichterstattung/Kosten-der-AU/pdf/Kosten-](https://www.baua.de/DE/Themen/Arbeitsweltberichterstattung/Kosten-der-AU/pdf/Kosten-2017.pdf?__blob=publicationFile&v=4)  
343 [2017.pdf?\\_\\_blob=publicationFile&v=4](https://www.baua.de/DE/Themen/Arbeitsweltberichterstattung/Kosten-der-AU/pdf/Kosten-2017.pdf?__blob=publicationFile&v=4). Accessed 20 March 2019.
- 344 12. Bundesanstalt für Arbeitsschutz und Arbeitsmedizin. Psychological strain. Available:  
345 [https://www.baua.de/DE/Themen/Arbeitsgestaltung-im-Betrieb/Psychische-](https://www.baua.de/DE/Themen/Arbeitsgestaltung-im-Betrieb/Psychische-Belastung/_functions/BereichsPublikationssuche_Formular.html?nn=8580646)  
346 [Belastung/\\_functions/BereichsPublikationssuche\\_Formular.html?nn=8580646](https://www.baua.de/DE/Themen/Arbeitsgestaltung-im-Betrieb/Psychische-Belastung/_functions/BereichsPublikationssuche_Formular.html?nn=8580646). Accessed 11  
347 March 2019.
- 348 13. Lemyre L, Tessier R. Measuring psychological stress. Concept, model, and measurement  
349 instrument in primary care research. *Can Fam Physician*. 2003; 49: 1159-60, 1166-8.
- 350 14. Rohmert W, Rutenfranz J. Arbeitswissenschaftliche Beurteilung der Belastung und  
351 Beanspruchung an unterschiedlichen industriellen Arbeitsplätzen: Der Bundesminister für Arbeit  
352 und Sozialordnung; 1975.
- 353 15. Rau R, Henkel D. Zusammenhang von Arbeitsbelastungen und psychischen Erkrankungen. *Der*  
354 *Nervenarzt*. 2013; 84: 791–798. doi: 10.1007/s00115-013-3743-6.
- 355 16. Rau R, Buyken D. Der aktuelle Kenntnisstand über Erkrankungsrisiken durch psychische  
356 Arbeitsbelastungen. *Zeitschrift für Arbeits- und Organisationspsychologie A&O*. 2015; 59: 113–  
357 129. doi: 10.1026/0932-4089/a000186.
- 358 17. Gesetz über die Durchführung von Maßnahmen des Arbeitsschutzes zur Verbesserung der  
359 Sicherheit und des Gesundheitsschutzes der Beschäftigten bei der Arbeit (Arbeitsschutzgesetz -  
360 ArbSchG); 2015.
- 361 18. Weigl M, Herbig B, Bahemann A, Böckelmann I, Darius S, Jurkschat R, et al. Recommendations  
362 on developing and carrying out psychosocial risk evaluations at the workplace. *ASU -*  
363 *Arbeitsmed Sozialmed Umweltmed*. 2015: 660–665.

- 364 19. Hahnzog S. Gesund und glücklich arbeiten – Gefährdungsbeurteilung psychischer  
365 Arbeitsbelastung. In: Pfannstiel MA, Mehlich H, editors. BGM – Ein Erfolgsfaktor für  
366 Unternehmen: Lösungen, Beispiele, Handlungsanleitungen. Wiesbaden: Springer Fachmedien  
367 Wiesbaden; 2018. pp. 681–698.
- 368 20. Richter G. Toolbox Version 1.2. - Instrumente zur Erfassung psychischer Belastungen.; 2010.  
369 Available: <https://www.baua.de/DE/Angebote/Publikationen/Berichte/F1965.html>. Accessed 2  
370 April 2019.
- 371 21. Viehmann A, Kersting C, Thielmann A, Weltermann B. Prevalence of chronic stress in general  
372 practitioners and practice assistants: Personal, practice and regional characteristics. PLoS ONE.  
373 2017; 12: e0176658. doi: 10.1371/journal.pone.0176658.
- 374 22. Dreher A, Theune M, Kersting C, Geiser F, Weltermann B. Prevalence of burnout among German  
375 general practitioners: Comparison of physicians working in solo and group practices. PLoS ONE.  
376 2019; 14: e0211223. doi: 10.1371/journal.pone.0211223.
- 377 23. Viehmann A, Thielmann A, Gesenhues S, Weltermann B. Do Academic Family Practices Reflect  
378 Routine Primary Care. Repräsentieren akademische Hausarztpraxen die hausärztliche  
379 Regelversorgung. Eine methodische Annäherung. Z. Allg Med. 2014: 354–360.
- 380 24. Elm E von, Altman DG, Egger M, Pocock SJ, Gotsche PC, Vandenbroucke JP. The Strengthening  
381 the Reporting of Observational Studies in Epidemiology (STROBE) statement: guidelines for  
382 reporting observational studies. **J Clin Epidemiol**. 2008; 61: 344–349.  
383 doi: 10.1016/j.jclinepi.2007.11.008.
- 384 25. Prümper J, Hartmannsgruber K, Frese M. KFZA. Kurz-Fragebogen zur Arbeitsanalyse. **European**  
385 **Economic Review - EUR ECON REV**. 1995; 39.
- 386 26. Prümper J. Von der KFZA-Grobanalyse zur IPLV-Feinanalyse Eine Methode zur  
387 Maßnahmenentwicklung in der Evaluierung psychischer Belastung. personal manager. 2015; 2.
- 388 27. Richter G. Toolbox Version 1.2. Instrumente zur Erfassung psychischer Belastungen ; Forschung  
389 Projekt F 1965. 2nd ed. Dortmund: Bundesanstalt für Arbeitsschutz und Arbeitsmedizin; 2011.
- 390 28. Allgemeine Unfallversicherungsanstalt (AUVA). Kurzfragebogen zur Arbeitsanalyse. Available:  
391 <https://fragebogen-arbeitsanalyse.at/login>. Accessed 2 April 2019.
- 392 29. Leittretter S, editor. Arbeit in Krankenhäusern human gestalten. Arbeitshilfe für die Praxis von  
393 Betriebsräten, betrieblichen Arbeitsschutzexperten und Beschäftigten in Krankenhäusern.  
394 Düsseldorf: Hans-Böckler-Stiftung; 2008.
- 395 30. Orgambidez-Ramos A, Almeida H de. Work engagement, social support, and job satisfaction in  
396 Portuguese nursing staff: A winning combination. **Appl Nurs Res**. 2017; 36: 37–41.  
397 doi: 10.1016/j.apnr.2017.05.012.
- 398 31. Szecsenyi J, Goetz K, Campbell S, Broge B, Reuschenbach B, Wensing M. Is the job satisfaction of  
399 primary care team members associated with patient satisfaction. **BMJ Quality & Safety**.  
400 2011; 20: 508. doi: 10.1136/bmjqs.2009.038166.
- 401 32. Schneider A, Weigl M. Associations between psychosocial work factors and provider mental  
402 well-being in emergency departments: A systematic review. PLoS ONE. 2018.  
403 doi: 10.1371/journal.pone.0197375.
- 404 33. Halter M, Boiko O, Pelone F, Beighton C, Harris R, Gale J, et al. The determinants and  
405 consequences of adult nursing staff turnover: a systematic review of systematic reviews. **BMC**  
406 **Health Serv Res**. 2017. doi: 10.1186/s12913-017-2707-0.



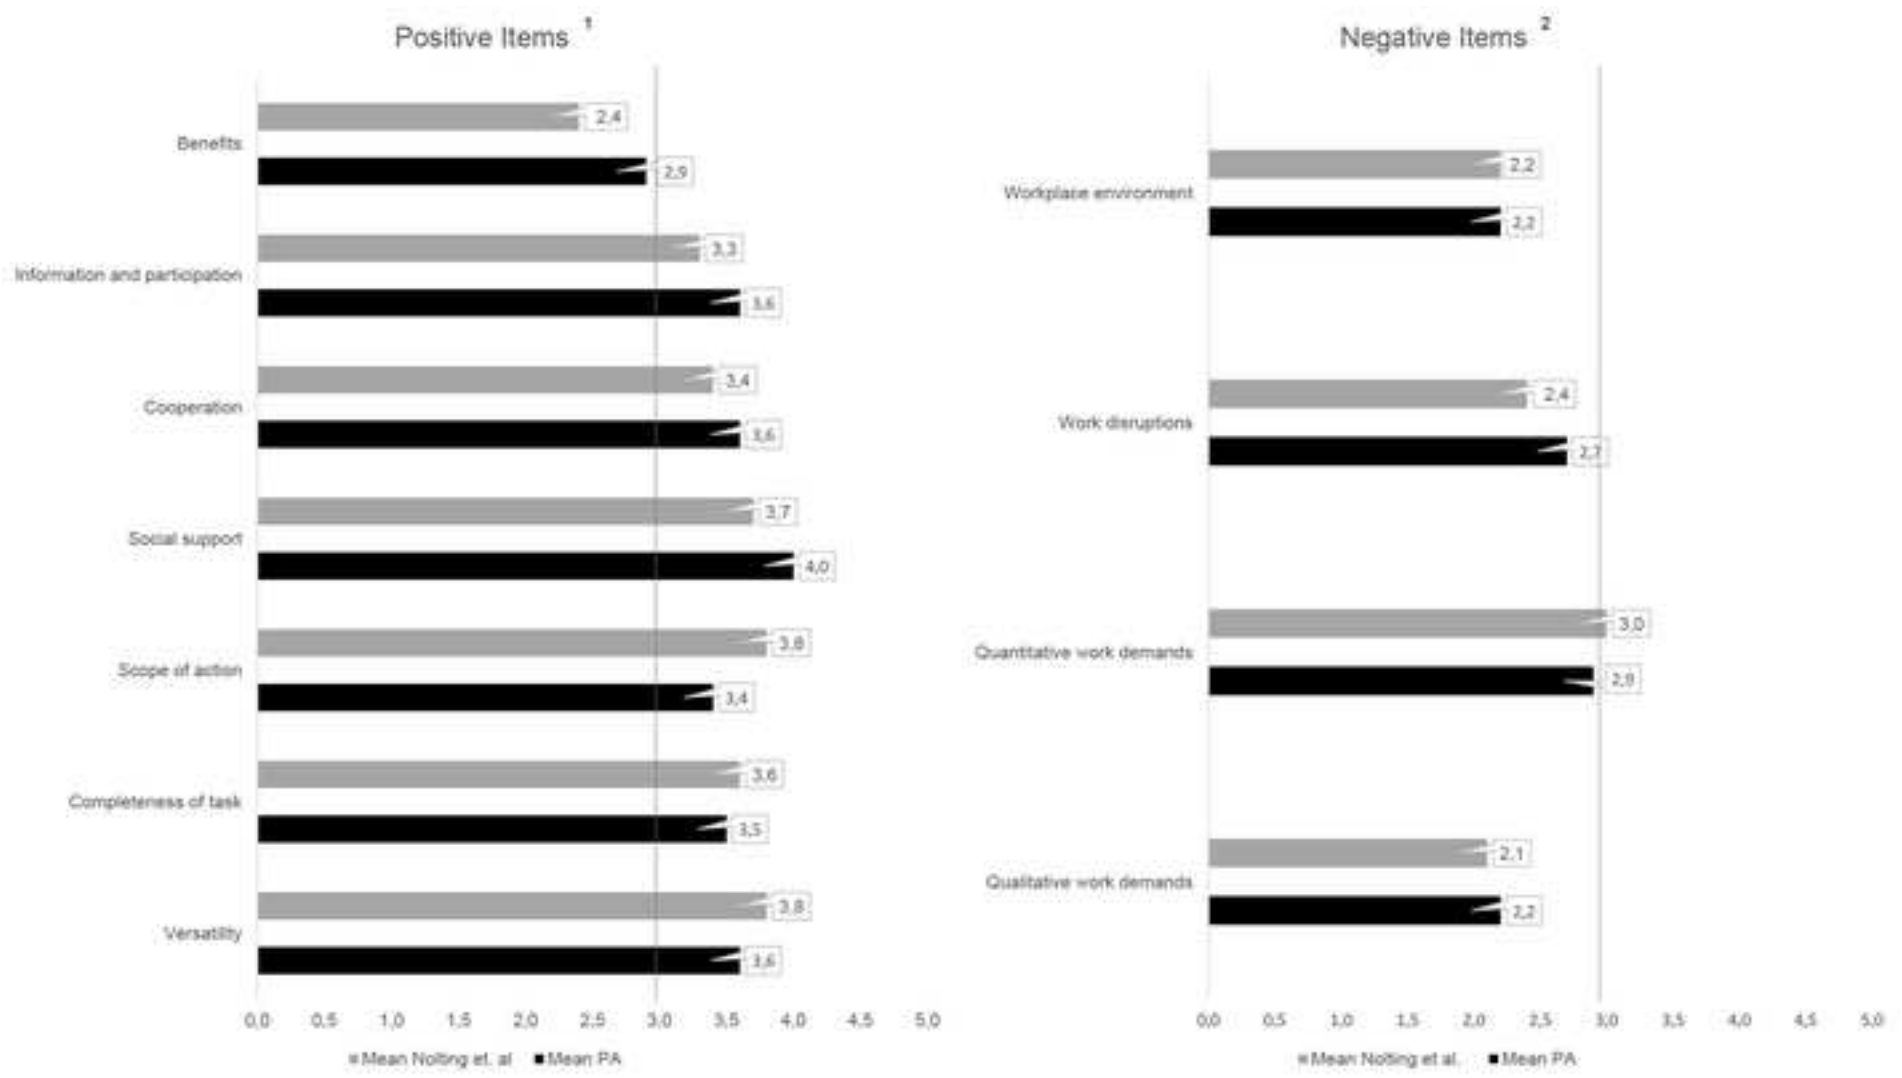

1 **Practice assistants' perceived mental work-load: [A](#) cross-sectional study with 550 German**  
2 **participants addressing work content, stressors, resources, and organizational structure**

**Style Definition:** Heading 1: Font: +Body (Calibri), Bold, Font color: Text 1

**Style Definition:** Heading 2: Font: Bold

3 Jan Hoffmann<sup>1, #a\*</sup>, Christine Kersting<sup>2, #b</sup>, Birgitta Weltermann<sup>1</sup>

**Formatted:** English (United States)

4  
5 <sup>1</sup> Institute of General Practice and Family Medicine, University Hospital of Bonn, ~~53127~~ Bonn, Germany

6 <sup>2</sup> Institute for General Medicine, University Hospital Essen, University of Duisburg-Essen, ~~45122~~ Essen,  
7 Germany

8 <sup>#a</sup> ~~Current Address:~~ Institute of Medical Sociology, Health Services ~~Research~~ [Research](#) and  
9 Rehabilitation Science, University of Cologne, ~~50933~~ Cologne, Germany

**Formatted:** English (United States)

**Formatted:** English (United States)

**Formatted:** English (United States)

**Formatted:** English (United States)

10 <sup>#b</sup> ~~Current Address:~~ Chair for Innovation and Collaboration in Ambulatory Health Care, Faculty of  
11 Health/School of Medicine, Witten/Herdecke University, ~~58448~~ Witten, Germany

**Formatted:** English (United States)

12  
13 \* Corresponding author

14 E-mail: ~~jan.hoffmann@uk-koeln.de~~ [jan.hoffmann@uk-koeln.de](mailto:jan.hoffmann@uk-koeln.de) (JH)

**Formatted:** German (Germany)

**Formatted:** Default Paragraph Font, German

**Formatted:** Default Paragraph Font, German

**Formatted:** German (Germany)

15  
16  
17  
18  
19  
20  
21



## Abstract

Formatted: Heading 1, Left

**Introduction:** Practice assistants (PAs) represent a highly relevant occupational group in Germany and one of the most popular training professions in Germany. Yet despite this, most research in the health care sector has focused on secondary care settings, but has not addressed practice assistants' PAs in primary care. Knowledge especially little is known regarding about practice assistants' PAs work-place related stressors and resources is particularly scarce. This cross-sectional study addresses the mental workload of practice assistants, PAs working in primary care practices.

**Methods:** This cross-sectional study invited practice assistant PAs from a network of 185 German primary care practices were invited to participate in this cross-sectional study. The standardized 'Short Questionnaire for Workplace Analysis'—Analysis' (German: Kurzfragebogen zur Arbeitsanalyse, KFZA) (KFZA) was used to assess practice assistants' PAs' mental workload. It addresses eleven KFZA-workplace factors in 26 items: versatility, completeness of task, scope of action, social support, cooperation, qualitative work demands, quantitative work demands, work disruptions, workplace environment, information and participation, and benefits. Also socio-demographic and work characteristics were also obtained requested. A descriptive analysis was performed for sociodemographic data and KFZA—'Short Questionnaire for Workplace Analysis' factors. The one-sided t-test and Cohen's d were calculated for a comparison with available data from 23 professional groups (n=8,121).

**Results:** A total of 550 PAs—practice assistants from 130 practices participated. The majority of PAs practice assistants was female (98.5%) and worked full-time (64.5%) in group practices (50.2%). comparison-Compared to the other professional groups, PAs—practice assistants reported higher values for the factor social support (4.0 versus- 3.7 [d 0.44; p<0.001]), information and participation (3.6 versus- 3.3 [d 0.38; p<0.001] as well as work disruptions (2.7 vs. 2.4 [d 0.42; p<0.001]), while PAs practice assistants showed lower values regarding scope of action (3.4 versus- 3.8 [d 0.43; p<0.001]).

46 **Conclusions:** Our study identified social support and participation within primary care practices as a  
47 protective factor<sub>s</sub> for mental workload<sub>l</sub> while work disruptions and scope of action were perceived as  
48 stressors.

49 Keywords: practice assistants, primary care, mental workload, psychosocial risk assessment, workplace  
50 characteristics

51

## 52 Introduction

53 Practice assistants (PrAs) represent the largest group of employees in the German ambulatory  
54 outpatient health care sector [1] and the second most popular training profession among German  
55 women [2]. However, little is known about how PrAs perceive their working conditions. More  
56 specifically, there is a lack of data on the relationship between work and psychological stress in PrAs  
57 are lacking. While a number of studies exist for psychosocial assessment studies of health personnel  
58 in secondary care have been performed [3–6], only few studies have addressed this issue in PrAs in  
59 German primary care [1,7,8]. Therefore, it is important to further investigate PrAs' generate further  
60 evidence for PAs' perceived level of psychological stress. This is relevant as psychological strain may  
61 not only threaten PrAs' health with potentially tremendous economic costs, but may also impair high  
62 high-quality patient care [9].

63 In recent years, increasing attention has been devoted to employees' mental health. In recent years, a  
64 growing interest has been devoted to employees' mental health of employees. A systematic review by  
65 Theorell and colleagues et al. has highlighted showned that evidence for the impact of job strain has  
66 an impact on the development of depressive symptoms [10]. Also, the socio-economic implications  
67 are increasingly evident: only preceded only by musculoskeletal diseases, mental health  
68 conditions place rank second with 16.7% of all sick leaves among German employees [11](44) and  
69 caused a damage of 21.7 billion Euros loss of gross added gross-value in 2017 [11].

Formatted: Heading 1, Left

Formatted: Font: Not Bold

Commented [TR1]: Dies ist ein wenig unglücklich ausgedrückt, da der Fokus meines Erachtens weniger darauf liegen sollte, neue Hinweise bzw. Beweise zu erbringen, sondern das vorhandene Wissen aufzustocken (also allgemein ist die Formulierung "generate evidence" etwas unschön). Ich würde es umformulieren, z.B. "... it is important to further investigate PAs' perceived ...".

Commented [TR2]: Man kann diesem Thema vielleicht mehr Zeit widmen, aber nicht Interesse - hier wäre attention besser. (Zum Beispiel: In recent years, increasing attention has been devoted to employees's mental health.")

70 The ~~load-stress-model~~ stress-strain model developed by Rohmert and Rutenfranz in 1975 differentiates  
71 between the terms 'psychological stress' ~~as defined above~~ and 'psychological strain'. ~~The term~~  
72 'Psychological stress' describes all external factors that influence one's psychological well-being.  
73 When ~~connecting-referring to~~ psychological stress ~~to-in~~ a work environment, the term 'mental work  
74 load' refers to employees' ~~expositions-exposure~~ exposure to individual work demands and the environment at  
75 work [12]. ~~However, t~~he term ~~however~~ does not necessarily have imply a negative ~~phenomenon~~  
76 connotation [13]. 'Psychological strain' can be understood as ~~the-an~~ individual's ~~immediate~~ response  
77 to psychological stress. Thus, the same ~~amount-level~~ level of psychological stress may ~~elicit lead to a~~  
78 different ~~amount-level~~ level of psychological strain depending on an employee's coping strategy and  
79 constitution [14]. A well-balanced amount of psychological strain can lead to a healthy and productive  
80 workflow [12], while an extreme ~~form-level~~ level of psychological strain may threaten employees' health.  
81 Studies have shown a negative association between high ~~amounts-levels~~ levels of psychological strain and  
82 mental illness [15,16].

83 Since 2014, the German Safety and Health at Work Act (ArbSchG) ~~law legislation (German Safety and~~  
84 ~~Health at Work Act)~~ obligates employers to perform a general risk assessment of their employees'  
85 working conditions [17]. ~~Part of this risk assessment is the assessment of~~ Assessing the mental  
86 workload ~~(a so-called 'psychosocial risk assessment') is part of this risk assessment (so-called~~  
87 ~~'psychosocial risk assessment')~~. Based on ~~such assessments~~ the results, employers must take need to  
88 ~~perform~~ counter-measures ~~if-as~~ necessary to enhance their employees' health [18]. Due to differences  
89 in work demands, work hazards, and work environments ~~across professions there is no gold standard~~  
90 that defines what on what instrument ~~to-should be used~~ for the psychosocial risk assessment. While  
91 different instruments exist [19], the so-called ~~KFZA-Kurzfragebogen zur Arbeitsanalyse (KFZA; English:~~  
92 ~~Short Questionnaire for Workplace Analysis)~~, ~~(a-short~~ questionnaire addressing perceived  
93 workload, ~~)~~ is widely used across professions [20]. ~~with-d~~ Data from ~~over-more than~~ 8,000  
94 000 participants from ~~23-23~~ 23 professionals are available [8].

**Commented [TR3]:** German Occupational Safety and Health Act?

95 The aims of this cross-sectional study are threefold: i) to assess the mental workload of PrAs working  
96 in German primary care practices, ii) to identify resources and stressors, and iii) to compare results  
97 with aggregated data from 23-23 different professions.

98

## 99 **Material and Methods**

Formatted: Heading 1, Left

Formatted: Font: Not Bold

### 100 **Study design and recruitment of participants**

101 The psychosocial assessment of PrAs reported in this paper was obtained as part of a larger cross-  
102 sectional study investigating multiple aspects of stress in primary care practices. Details of the study  
103 are reported elsewhere [21,22]. Briefly, general practitioners (GPs) and PrAs of the 185-general  
104 medicine practices of the practice network of the Institute for General Medicine, University Hospital  
105 Essen, Essen, Germany, were asked to participate in the study. The practices were located in urban  
106 and rural regions of North-Rhine-Westphalia (Western Germany) with an average distance of 30-km  
107 (range: 2±180-km) to the Institute. In a prior study, it was shown that the practices affiliated with the  
108 network are representative for German primary care practices [23]. Practices had been invited by mail  
109 and contacted by phone for further recruitment. Those refusing to participate had been were asked to  
110 answer a short questionnaire on practice characteristics and to provide reasons for non-participation.  
111 Data were collected between April and September 2014 during on-site visits. Within each practice, all  
112 GPs (practice owners and employed physicians) and PrAs including medical secretaries and PrA  
113 trainees were eligible for participation and received the study documents. The study documents  
114 comprised a study information sheet, an informed consent form to be completed by all participants,  
115 and a set of questionnaires which included sociodemographic questions and the Short Questionnaire  
116 for workplace Workplace analysis Analysis (KFZA) analyzed in this paper. To ensure data protection,  
117 participants were asked to seal the completed questionnaire in an envelope. As an incentive, practice  
118 teams received a department store chain voucher of 5-euros per person, irrespective of the

119 participation of ~~single individual~~ team members. In addition, the dataset contained information about  
120 ~~the~~ practices' location ~~that was received~~ from the practice network's database and matched with  
121 public regional data for ~~the~~ population size ~~on a in~~ 2012 ~~level~~ (www.it.nrw.de).

122 ~~This paper follows the STROBE recommendations for reporting cross-sectional studies. This paper was~~  
123 ~~informed by the STROBE Statement for reporting cross-sectional studies~~ [24].

125 ~~Ethical approval had been obtained from the Ethics Committee of the Medical Faculty of the University~~  
126 ~~of Duisburg-Essen (reference number: 13-5536-BO, date of approval: 24/11/2014). All participants~~  
127 ~~received written information and signed informed consent forms.~~

## 128 Study instrument to assess mental workload

129 The ~~short questionnaire for workplace analysis (German: Kurzfragebogen zur Arbeitsanalyse (KFZA))~~  
130 was developed by Prümper ~~et al. and colleagues~~ in 1995 and ~~is serves~~ as a ~~widely well~~-accepted  
131 screening tool for psychological stress at the workplace [25]. The questionnaire is a standardized  
132 instrument with closed questions. It is ~~filled-completed~~ by the employees themselves and thus  
133 ~~represents-provides~~ a subjective view of each individual's perception of the work environment.  
134 According to DIN EN ISO 10075 "Ergonomic principles related to mental workload", the instrument is  
135 categorized as a "precision level 2 process for overview purposes" [26]. The instrument is listed in the  
136 toolbox for "Instruments for recording mental loads" of the Federal Institute for Occupational Safety  
137 and Health and covers multiple aspects of the work environment [27]. It ~~eovers-includes~~ four  
138 dimensions: *work content, resources, stressors, and organizational culture*. Dimensions consist of  
139 11 ~~factors~~ which are derived from 26 single items with answer options on a Likert ~~ss~~ scale ranging from  
140 1 (does not apply at all) to 5 (is completely true). ~~The dimension Wwork content dimension~~ contains  
141 two factors (versatility, completeness of task) and five single items (learning new skills, use of  
142 knowledge, skills and ability, variety of tasks, visibility of task accomplishment, completeness of  
143 product). ~~The dimension Rresources dimension~~ contains three factors (scope of action, social support,  
144 cooperation) and nine single items (influence on sequence of activities, influence on work content,

**Commented [TR4]:** Was genau ist hiermit gemeint?

**Commented [JH5R4]:** Hier soll stehen, dass das Paper den STROBE guidelines aus dem STROBE Statement gefolgt ist. Vielleicht so: „This paper follows the STROBE recommendations for reporting cross-sectional studies.“

**Formatted:** Font: Not Bold

**Formatted:** Space After: 0 pt, Don't adjust space between Latin and Asian text, Don't adjust space between Asian text and numbers

**Formatted:** Heading 2, Left

**Formatted:** Font: Italic

**Formatted:** Font: Italic

**Formatted:** Font: Italic

**Formatted:** Font: Italic

145 influence on work-load and procedures, social support by co-workers, social support by supervisors,  
146 social cohesion within the department, necessity of cooperation, opportunity for social exchange with  
147 co-workers, feedback from supervisors and co-workers). *The dimension Stressors dimension* contains  
148 four factors (qualitative work demands, quantitative work demands, work disruptions, workplace  
149 environment) and eight single items (excessive complexity of tasks, excessive demands on  
150 concentration, frequent work under time pressure, too much work to do, lack of information, work  
151 materials or equipment, interruptions of workflow, unfavorable physicochemical conditions,  
152 insufficient work-space and equipment). *Lastly, the dimension Organizational culture dimension*  
153 contains two factors (information and participation, benefits) and four single items (information about  
154 organizational developments, consideration of employee input, continuous education, opportunities  
155 for advancement). The dimensions job content, resources, and organizational culture represent  
156 positive aspects, and high values-scores are considered beneficial/positive. High values-scores in the  
157 dimension-stressors dimension are considered negative work aspects-of work.

Formatted: Font: Italic

Formatted: Font: Italic

158 Given the time-constraints in primary care practices, the KFZA was ~~deemed chosen as a suitable tool~~  
159 as it takes only 10-minutes time to complete. Also, data from more than 8,000-participants from 23  
160 other professional groups are available for comparison [25]. The questionnaire can be applied  
161 throughout all professions and workspaces and is ~~freely-readily~~ available for academic use [28].

## 163 **Comparative data from 23-professional groups**

Formatted: Heading 2, Left

164 In 2000, the Employers' Liability Insurance Association for Medical Services and Welfare Work (BGW)  
165 in cooperation with the German Employees' Health Insurance (DAK) conducted a cross-sectional study  
166 to measure stress at work [8]. A purposive sample of 27,584-employees from 23-professional groups  
167 was selected from the BGW and DAK register: physicians, assistant pharmacists, pharmacists, office  
168 workers, teacher, hairdressers, pest controllers, alternative practitioners, unskilled laborers,  
169 kindergarten teachers, chefs, nurses, masseurs, medical laboratory technicians, porters, facility

170 cleaners, social workers, ~~PrAs practice assistants~~, veterinarians, care workers for persons at risk,  
171 employees of dialysis centers, and employees of workshops for the disabled. A total of  
172 8,121 employees ~~had~~ participated in the ~~eat~~ study in the context of a project called 'Prevention of work-  
173 related health hazards'. The KFZA ~~had been was~~ used within the scope as part of the ~~eat~~ study. We  
174 performed two comparative analyses using published data of the ~~eat~~ survey: first, we compared KFZA  
175 results from the ~~eat~~ study ~~for of the~~ 23 professional groups with results from our population. Second,  
176 we compared the results for the subpopulation of PrAs from the ~~eat~~ study with results from our  
177 population. The latter comparison is particularly interesting, as it provides a longitudinal approach  
178 (data from 2000 and 2014) in a situation where the vocational training was meanwhile been revised  
179 ~~meanwhile~~ and PrAs in Germany are professionalizing.

180

## 181 Data analysis

182 The aAnalysis was performed using IBM SPSS Statistics for Windows, Version 25 (Armonk, NY: IBM  
183 Corp.). Data of all PrAs were analyzed. Missing data are reported for all items. Non-plausible values  
184 were recoded as missing values.

185 Socio-demographic and work-related characteristics were analyzed descriptively. The mean, standard  
186 deviation (SD), median, and range are reported fFor metric socio-demographic and work variables  
187 mean, standard deviation (SD), median, and range are reported. The Ppractices' areas' population size  
188 was categorized into rural, small, medium-sized, and big cities following categorization schemes of the  
189 Federal Institute for Research on Building, Urban Affairs and Spatial Development (rural  $\leq$   
190 4,999 inhabitants, small city 5000—19,999, medium-sized city 20,000—99,999, big city  $\geq$   
191 100,000).

192 Following Prümper et al. and colleagues, the results of the evaluation of the KFZA was performed were  
193 evaluated by computing mean values on a factor level [25,29]: As a first overview, positive items  $<3$   
194 and negative items  $>3$  respectively are interpreted as high amounts levels of psychological stress and

Formatted: Heading 2, Left

195 indicate ~~the a~~ need for more detailed analyses. In addition, the comparison with data from other  
196 professional groups or ~~from~~ the same professional group provides information on how to ~~set a~~  
197 benchmark against other results [29]. Differences between the means of our population and the  
198 comparative population were analyzed using a ~~one-one~~-sided t-test (95% significance level; 0.05 =  
199 alpha). Additionally, Cohen's d was calculated to estimate ~~the~~ effect size. 95% confidence intervals (CI)  
200 were calculated for factors of the 2014 PrA population.

201

## 202 Results

### 203 Study characteristics

204 550 PrAs ~~had~~ participated in the study (response rate 70.3%; n=130 practices). There were ~~4~~ four  
205 implausible values that were recoded as missing values. The socio-demographic characteristics of the  
206 participants are presented in ~~T~~table\_1. PrAs had a mean age of 37.97 ~~years~~ (SD: 12.63) ~~years~~, with  
207 98.55% of PrAs being female. The majority of PrAs was married (50.364%), worked full-time (64.55%)  
208 ~~in an open term employment on a permanent contract~~ (84.55%) with a median work experience of ~~18~~  
209 ~~18~~ years (range, ranging from: 0-49 years). Most (61.45%) ~~of~~ PrAs worked ~~20~~ 39-39 hours a week,  
210 while 24.91% of PrAs worked more than ~~39-39~~ hours. Most PrAs (90.73%) had ~~finished-completed~~ a  
211 ~~three-year~~ three-year vocational training ~~with a degree~~ as "Medizinische Fachangestellte" or "Arzt-  
212 helferin" which combines ~~practice-practical~~ training (3-3 days per week) and vocational ~~school~~ training  
213 (~~2-2~~ days per week). ~~Ten percent (10.9%)~~ Eleven percent had other backgrounds (i.e.: secretary,  
214 practice aid, other practice employees). Almost all PrAs had completed some sort of additional  
215 training: 22.4% of PrAs had completed ~~an~~ additional training as VERAHs (~~106-106~~ hours of theoretical  
216 and ~~94-94~~ hours of practical training) or EVAs (170 to ~~220-220~~ hours of theoretical training and 20 to  
217 ~~50-50~~ hours of practical training depending on prior work experiences) that allows PrAs to perform  
218 additional tasks (eg. eg.: home visits). On average, PrAs worked in practices with 2.96 (SD 2.15)

Formatted: Heading 1, Left

Formatted: Font: Not Bold



219 physicians and 7.73 (SD 7.64) PrAs. Half of ~~all the~~ practices (50.182%) were group practices. The ~~lowest~~  
220 ~~smallest~~ proportion of PrAs worked in practices with a low ~~patient load number of patients~~ per quarter  
221 (5.45%, 501-1000 patients per quarter), while the ~~highest-largest~~ proportion of PrAs worked in  
222 practices with ~~a high numbers of patients load~~ per quarter (27.273%, >3001 patients per quarter).  
223 PrAs' work setting characteristics are presented in ~~Table-2~~.

224  
225  
226  
227  
228  
229  
230  
231  
232  
233  
234  
235  
236  
237  
238

239 **Table-1: Practice assistants' socio-demographic and professional training characteristics (n=550).**

Formatted: Font: Bold

| Variable                             | Total (n=550) | 100%*     |
|--------------------------------------|---------------|-----------|
| <b>Age (n=550, years)</b>            |               |           |
| [Mean_(SD)]                          | 37.97         | (12.5-63) |
| [Median_(Min-Max)]                   | 38            | (16-71)   |
| <i>Missing (n, %)</i>                | 0             | 0         |
| <b>Gender (n, %)</b>                 |               |           |
| Female                               | 542           | 98.55     |
| Male                                 | 4             | 0.73      |
| <i>Missing</i>                       | 4             | 0.7       |
| <b>Marital status (n, %)</b>         |               |           |
| Single                               | 218           | 39.63     |
| Married                              | 277           | 50.364    |
| Divorced                             | 45            | 8.182     |
| Widowed                              | 7             | 1.273     |
| <i>Missing</i>                       | 3             | 0.5       |
| <b>Status of employment (n, %)</b>   |               |           |
| Full-time                            | 355           | 64.55     |
| Part-time                            | 179           | 32.55     |
| <i>Missing</i>                       | 16            | 2.9       |
| <b>Mode of employment (n, %)</b>     |               |           |
| Fixed-term-employment                | 56            | 10.182    |
| Open-term-employmentPermanent        | 465           | 84.55     |
| <i>Missing</i>                       | 29            | 5.3       |
| <b>Working hours per week (n, %)</b> |               |           |
| 0--19                                | 65            | 11.82     |
| 20--39                               | 338           | 61.45     |
| 40--59                               | 127           | 23.094    |

|                                                |               |                 |
|------------------------------------------------|---------------|-----------------|
| >60                                            | 10            | 1.8 <u>2</u>    |
| <i>Missing</i>                                 | <del>10</del> | <del>1.8</del>  |
| <b>Work experience (n=550, years)</b>          |               |                 |
| [Mean (SD)]                                    | 18.74         | (12,46)         |
| [Median (Min-Max)]                             | 18            | (0-49)          |
| <i>Missing (n, %)</i>                          | <del>10</del> | <del>1.8</del>  |
| <b>PrA in training (n, %)</b>                  |               |                 |
| Yes                                            | 49            | 8.9 <u>1</u>    |
| No                                             | 499           | 90.7 <u>3</u>   |
| <i>Missing</i>                                 | <del>2</del>  | <del>0.4</del>  |
| <b>Year of training (n=51, %)</b>              |               |                 |
| First year                                     | 16            | 31.3 <u>7</u> 4 |
| Second year                                    | 19            | 37.2 <u>5</u> 3 |
| Third year                                     | 12            | 23.5 <u>3</u>   |
| <i>Missing</i>                                 | <del>4</del>  | <del>7.8</del>  |
| <b>Vocational training <sup>1</sup> (n, %)</b> |               |                 |
| Practice assistants                            | 490           | 89.0 <u>9</u> 4 |
| Secretary                                      | 12            | 2.1 <u>8</u> 2  |
| Practice aid <sup>2</sup>                      | 6             | 1.0 <u>9</u> 4  |
| Other practice employees <sup>2</sup>          | 16            | 2.9 <u>1</u>    |
| <i>Others</i>                                  | 75            | 13.6 <u>4</u>   |
| <i>Missing</i>                                 | <del>28</del> | <del>5.4</del>  |
| <b>Additional training (n=137, %)</b>          |               |                 |
| VERAH                                          | 14            | 10.2 <u>2</u>   |
| EVA                                            | 3             | 2.1 <u>9</u> 2  |
| VERAH/EVA + other                              | 8             | 5.8 <u>4</u>    |
| Other                                          | 105           | 76.6 <u>4</u>   |
| <i>Missing</i>                                 | <del>7</del>  | <del>5.1</del>  |

240 <sup>1</sup> multiple answers possible, <sup>2</sup> no vocational training, \*numbers do not add up to 100% due to missing  
 241 values

Formatted: Font: 11 pt

242 Table 2: Practice assistants' work setting characteristics (n=550).

Formatted: Font: Bold

Formatted: Font: Bold

| Variable                                       | Total (n=550) | 100%   |
|------------------------------------------------|---------------|--------|
| <b>Type of practice (n, %)</b>                 |               |        |
| Solo practice                                  | 147           | 26.73  |
| Group practice                                 | 276           | 50.182 |
| Others                                         | 122           | 22.182 |
| Missing                                        | 5             | 0.9    |
| <b>Number of patients per quarter (n, %)</b>   |               |        |
| 501-1000                                       | 30            | 5.45   |
| 1001-1500                                      | 116           | 21.091 |
| 1501-2000                                      | 100           | 18.182 |
| 2001-2500                                      | 79            | 14.364 |
| 2501-3000                                      | 62            | 11.273 |
| >3001                                          | 150           | 27.273 |
| Missing                                        | 13            | 2.4    |
| <b>Location of practice<sup>1</sup> (n, %)</b> |               |        |
| Small town-city                                | 33            | 6.00   |
| Medium-sized town-city                         | 128           | 23.273 |
| Big city                                       | 371           | 67.45  |
| Missing                                        | 18            | 3.3    |
| <b>Number of physicians in practice</b>        |               |        |
| [Mean (SD)]                                    | 2.96          | (2.15) |
| [Median (Min-Max)]                             | 2             | (1-10) |
| Missing (n, %)                                 | 5             | 0.9    |
| <b>Number of PAs in practice</b>               |               |        |

Formatted: Font: 10 pt

|                           |               |                |
|---------------------------|---------------|----------------|
| [Mean (SD)]               | 7.73          | (7.64)         |
| [Median (Min-Max)]        | 5             | (0-35)         |
| <del>Missing (n, %)</del> | <del>33</del> | <del>6.0</del> |

Formatted: Font: 10 pt

Formatted: Font: 10 pt

Formatted: Font: 10 pt

243 <sup>1</sup> based on 2012 number of inhabitants. ~~\*numbers do not add up to 100% due to missing values~~

Formatted: Font: 11 pt

244

245 **Comparison of practice assistants with other professional groups**  
 246 **(comparative data)**

Formatted: Heading 2, Left

247 Table 3 shows the results of the KFZA analysis for PrAs and for the comparative population. For a first  
 248 overview of only results from our study population, the calculation of mean values for the factor-factor-  
 249 level analysis yielded a critical value score for the factor benefits (2.86 [SD 1.05]). In contrast, social  
 250 support showed the highest positive factor (4.05 [SD 0.79]).

251 As illustrated in Figure 1, the comparison of our results with data from Nolting et al. [8] revealed  
 252 statistically significant differences (p < 0.05) for the following factors: versatility (3.6 vs. 3.8),  
 253 completeness of task (3.5 vs. 3.6), scope of action (3.4 vs. 3.8), social support (4.0 vs. 3.7), cooperation  
 254 (3.6 vs. 3.4), qualitative work demands (2.2 vs. 2.1), work disruptions (2.7 vs. 2.4), information and  
 255 participation (3.6 vs. 3.3), and benefits (2.9 vs. 2.4). The two non-significant factors were workplace  
 256 environment (2.2 vs. 2.2) and quantitative work demands (2.9 vs. 3.0) were found to be non-significant.

257 Effect size showed the strongest difference for the factors social support (4.0 vs 3.7 [d 0.44]), scope of  
 258 action (3.4 vs. 3.8 [d 0.43]), and (benefits (2.9 vs. 2.4 [d 0.43])). The values scores for social support and  
 259 benefits were higher in the PrA population than in the comparative group, whereas scope of action  
 260 yielded lower values scores. However, the factor benefits, on the other hand, was critically low in both  
 261 populations. The difference in work disruptions (2.7 vs. 2.4 [d 0.41]) presented a moderate effect size.

262 The score for re were higher work disruptions was higher in the PrA population compared to the  
 263 population from Nolting et al. [8].

264

## 265 Comparison of practice assistants from 2000 and 2014

Formatted: Heading 2, Left

266 ~~Table 4 shows at the~~The comparison ~~of between PrAs~~practice assistants in our study population (from  
267 2014) and the comparative study population (from 2000). ~~The comparison~~ yielded statistically  
268 significant differences ( $p < 0.05$ ) for the factors completeness of task (3.5 vs. 3.2), social support (4.0  
269 vs. 3.9), cooperation (3.6 vs. 3.5), qualitative work demands (2.2 vs. 2.0), quantitative work demands  
270 (2.9 vs. 2.8), work disruptions (2.7 vs. 2.5), workplace environment (2.2 vs. 2.0), information and  
271 participation (3.6 vs. 3.5), and benefits (2.9 vs 2.2).

272 Effect size showed no effect for versatility ( $d_{-0.05}$ ), scope of action ( $d_{-0.01}$ ), social support ( $d_{-0.19}$ ),  
273 cooperation ( $d_{-d} 0.13$ ), quantitative work demands ( $d_{-d} 0.12$ ), as well as information and participation  
274 ( $d_{-d} 0.16$ ). ~~A s~~Small effect size was shown for completeness of task ( $d_{-d} 0.32$ ), qualitative work  
275 demands ( $d_{-d} 0.25$ ), work disruptions ( $d_{-d} 0.29$ ), and workplace environment ( $d_{-d} 0.21$ ). The difference  
276 in the factor benefits presented a moderate effect size ( $d_{-d} 0.62$ ).

**Table 3. KFZA results from our study of practice assistants (n=550) in comparison with comparative data from 23-23 professional groups (n= 8.121).**

| Work aspects                           | KFZA factor                   | Our study |                              | 95% CI      | Comparison:<br>Mean $\bar{x}$ Score (Nolting et al.) | Cohen's d | P-value ** |
|----------------------------------------|-------------------------------|-----------|------------------------------|-------------|------------------------------------------------------|-----------|------------|
|                                        |                               | Mean      | $\bar{s}$ Score<br>(PasPrAs) |             |                                                      |           |            |
| Job content <sup>1</sup>               | Versatility                   | 3.6       |                              | 3.58 - 3.70 | 3.8                                                  | 0.23      | < 0.001    |
|                                        | Completeness of task          | 3.5       |                              | 3.41 - 3.57 | 3.6                                                  | 0.12      | 0.0045     |
| Resources <sup>1</sup>                 | Scope of action               | 3.4       |                              | 3.37 - 3.49 | 3.8                                                  | 0.43      | < 0.001    |
|                                        | Social support                | 4.0       |                              | 3.98 - 4.12 | 3.7                                                  | 0.44      | < 0.001    |
|                                        | Cooperation                   | 3.6       |                              | 3.53 - 3.66 | 3.4                                                  | 0.24      | < 0.001    |
| Stressors <sup>2</sup>                 | Qualitative work demands      | 2.2       |                              | 2.14 - 2.29 | 2.1                                                  | 0.13      | 0.0025     |
|                                        | Quantitative work demands     | 2.9       |                              | 2.83 - 3.01 | 3.0                                                  | 0.07      | 0.0797     |
|                                        | Work disruptions              | 2.7       |                              | 2.67 - 2.81 | 2.4                                                  | 0.41      | < 0.001    |
|                                        | Workplace environment         | 2.2       |                              | 2.13 - 2.30 | 2.2                                                  | 0.02      | 0.7109     |
| Organizational<br>culture <sup>1</sup> | Information and participation | 3.6       |                              | 3.57 - 3.73 | 3.3                                                  | 0.38      | < 0.001    |
|                                        | Benefits                      | 2.9*      |                              | 2.77 - 2.94 | 2.4*                                                 | 0.43      | < 0.001    |

Formatted: Font: Bold

Formatted: Font: Bold

278 <sup>1</sup> High values-scores (>3) are considered positive, <sup>2</sup> high values-scores (>3) are considered negative, \* critical values \*\* based on a ~~one-sided~~one-sided t-test  
 279 comparing mean values of PrAs and Nolting et al. on a 95% significance level

Formatted: Font: 11 pt

Formatted: Font: 11 pt

281 **Figure 1:** KFZA results on a factor level divided into resources and stressors in comparison with comparative data from Nolting et al.

Formatted: Font: 11 pt

282 <sup>1</sup> High values-scores (>3) are considered positive, <sup>2</sup> high values-scores (>3) are considered negative.

Formatted: Font: 11 pt, Bold

Formatted: Font: 11 pt

Formatted: Font: 11 pt, Not Superscript/ Subscript

284 **Table 4:** KFZA factor-level comparison of PrAs from our study (n=550; year 2014) and PrAs from Nolting et al. (n=324; year 2000).

Formatted: Font: 11 pt

Formatted: Font: Bold

Formatted: Font: Bold

Formatted: Font: Bold

Formatted: Font: Bold

Formatted Table

| Work aspects             | KFZA factor              | Our study<br>Mean sScore (PrAs) | 95% CI      | PrAs' results from 2000 <sup>2</sup><br>Mean sScore (PrAs; Nolting et al.) | Cohen's d | P-value |
|--------------------------|--------------------------|---------------------------------|-------------|----------------------------------------------------------------------------|-----------|---------|
| Job content <sup>1</sup> | Versatility              | 3.6                             | 3.58 - 3.70 | 3.6                                                                        | 0.05      | 0.238   |
|                          | Completeness of task     | 3.5                             | 3.41 - 3.57 | 3.2                                                                        | 0.32      | < 0.001 |
| Resources <sup>1</sup>   | Scope of action          | 3.4                             | 3.37 - 3.49 | 3.4                                                                        | 0.01      | 0.765   |
|                          | Social support           | 4.0                             | 3.98 - 4.12 | 3.9                                                                        | 0.19      | < 0.001 |
|                          | Cooperation              | 3.6                             | 3.53 - 3.66 | 3.5                                                                        | 0.13      | 0.006   |
| Stressors <sup>2</sup>   | Qualitative work demands | 2.2                             | 2.14 - 2.29 | 2.0                                                                        | 0.25      | < 0.001 |



|                            |                                      |             |             |      |      |         |
|----------------------------|--------------------------------------|-------------|-------------|------|------|---------|
|                            | <b>Quantitative work demands</b>     | <b>2.9</b>  | 2.83 – 3.01 | 2.8  | 0.12 | 0.007   |
|                            | <b>Work disruptions</b>              | <b>2.7</b>  | 2.67 – 2.81 | 2.5  | 0.29 | < 0.001 |
|                            | <b>Workplace environment</b>         | <b>2.2</b>  | 2.13 – 2.30 | 2.0  | 0.21 | < 0.001 |
| <b>Organizational</b>      | <b>Information and participation</b> | <b>3.6</b>  | 3.57 – 3.73 | 3.5  | 0.16 | 0.002   |
| <b>culture<sup>1</sup></b> | <b>Benefits</b>                      | <b>2.9*</b> | 2.77 – 2.94 | 2.2* | 0.62 | < 0.001 |

285 <sup>1</sup> High scores (>3) are considered positive, <sup>2</sup> high values (>3) are considered negative, \* critical values \*\* based on a ~~one-sided~~ one-sided t-test  
 286 comparing mean values of P<sub>r</sub>As and Nolting et al. on a 95% significance level

## Discussion

Our study identified social support within primary care practices as a resource and a protective factor for mental work-load among PrAs, while the lack of benefits at work was perceived as a stressor.

When comparing data on PrAs with the aggregated data of other professional groups, we were able to perform a more informative analysis ~~was possible~~ yielding slightly different results. Scope of action and work disruptions showed the largest negative difference and the strongest effect size, whereas social support and benefits showed the largest positive difference and the strongest effect size.

Interestingly, when comparing with other professional groups, the factor benefits that was ~~interpreted~~ identified as a stressor in the single evaluation turned out to be a resource ~~when comparing with other professional groups~~. Since ~~values the scores~~ are rather low in both samples, lack of benefits at work might be a general problem, ~~whereas while~~ PrAs might experience more benefits at work ~~compared to~~ than other professional groups. PrAs in general practices tend to be responsible for a wide range of tasks in different workplaces throughout the practices, ~~as they while are~~ representing the first point of contact for patients with unexpected events occurring on a regular basis [1]. This job profile may explain the high ~~values scores~~ for work disruptions. Although PrAs are responsible for a wide range of tasks, GPs remain the decision makers, ~~resulting in leading to~~ a setting-immanent limited scope of action for PrAs.

The comparison between the ~~professional groups of PrA groups~~ from 2000 to 2014 ~~showed revealed~~ significant differences ~~for~~ most factors, but small effect sizes. The factor benefits showed a moderate effect size in favor of the 2014 study population. All factors, positive factors and negative factors alike, were slightly higher in our population of PrAs compared to the 2000 PrA population ~~of PAs~~ from Nolting et al. ~~from 2000, positive factors and negative factors alike~~. The increase ~~of in~~ benefits at work and completeness of task from 2000 to 2014 may be explained by ~~a number of the possible~~ further trainings opportunities for PrAs that ~~were had been~~ introduced during that time period (i.e., VERAH, EVA).

Among other changes, these trainings have enabled PrAs ~~opened up the possibilities for PAs~~ to carry

Formatted: Heading 1, Left

Formatted: Font: Not Bold

312 out more complex work processes ~~at work~~ autonomously (i.e.g.: patient education on diabetes).  
313 Additionally, they are rewarded with a better salary. Both may be signs ~~for a of~~ professionalization.  
314 ~~PrAs in a~~ recent study ~~from by~~ Vu-Eickmann et al., PrAs reported a high patient volume, which in  
315 addition to handling many tasks at once may ~~explain the be the reason for~~ high score for work  
316 disruptions [1].

317 Social support is an important resource and can positively influence job satisfaction, as shown in a  
318 recent study with Portuguese nursing staff [30]. Job satisfaction was again ~~has been~~ shown to positively  
319 correlate with patient satisfaction [31]. A systematic review yielded a similar result ~~connecting-linking~~  
320 social support with staff well-being in emergency departments [32]. In contrast, studies have shown  
321 that negative work aspect (i.e.: lack of benefits, limited scope of action) cause psychological strain and  
322 can lead to a higher turnover rate and depressive symptoms [10,33].

323 In agreement with three other studies ~~available on the this~~ topic, we showed that PrAs in primary care  
324 practices receive high social support and have a rather limited scope of action and still insufficient  
325 benefits at work [1,7,8].  
326

## 327 **Strengths and limitations**

328 ~~It is a strength of our study that it was based on a data set with a large number of participants (550~~  
329 ~~PrAs). Also, prior analyses had shown that the practice network from which this sample was taken is~~  
330 ~~representative for German primary care practices. With 550 participating PAs, our study comprised~~  
331 ~~had a high large number of participants and a high response rate of 70.3%. Additionally, it was shown~~  
332 ~~that the practice network from which this sample was taken is representative for German primary care~~  
333 ~~practices~~ [23]. Each participant received an incentive in the form of a ~~5-5~~ Euro voucher to avoid a  
334 selection bias by ~~only~~ selecting only highly motivated PrAs. As the network is located in a rather densely  
335 populated area, our results may over-represent PrAs working in urban areas. The KFZA proved to be  
336 ~~an implementation economica~~ cost-effective screening tool to gain first insights into employees'

Formatted: Heading 2, Left

Commented [JH6]: Vom Reviewer markiert

337 psychological stressors and resources. To our knowledge this is the first study comparing PrAs' data  
338 from a psychological risk assessment in primary care with a large sample from other professions.  
339 In ~~this-our~~ study ~~we were it was~~ only ~~possible-able~~ to ~~measure-assess~~ the current situation and not the  
340 state desired by PrAs, which could have ~~given-provided even further-more~~ insights. ~~The c~~Comparison  
341 with data from ~~23-23~~ professional groups was limited as only aggregated mean results were available  
342 without standard deviations. Due to this, ~~we were unable to calculate a calculation of~~ confidence  
343 intervals for both populations ~~was not possible~~. A strength of our study is the comparison of ~~the results~~  
344 ~~of the~~ 2000 with ~~the~~ 2014 ~~results-study~~ from the same professional group. ~~Yet~~However, ~~the PrA these~~  
345 ~~were two different~~ populations ~~of PAs-were not identical~~, and caution is advised when interpreting ~~the~~  
346 results.

347

## 348 **Conclusion**s

349 Mental well-being has a tremendous impact on preserving a healthy and productive workforce.  
350 Therefore, ~~our it has to be the~~ goal ~~must be~~ to first identify risk factors for mental well-being at work  
351 and put them into perspective with other occupations, ~~which we aimed to do in as were the aims of~~  
352 this study. Second, ~~we need to develop~~ measures ~~need to be developed~~ to tackle risk factors for  
353 psychological strain at work and enhance protective factors such as social support, scope of action,  
354 benefits at work, and cooperation. Last~~ly~~, measures need to be evaluated and implemented in the  
355 everyday working life of PrAs.

356

Formatted: Heading 1, Left

Formatted: Font: Not Bold

Commented [JH7]: Markiert vom Reviewer

## 357 List of abbreviations

358 CI: confidence interval; GP: ~~General-general Practitionerpractitioner~~; KFZA: Kurzfragebogen zur  
359 Arbeitsanalyse (English: ~~short-Short questionnaire-Questionnaire~~ for ~~workplace-Workplace~~  
360 ~~analysisAnalysis~~); PrA: ~~Practice-practice~~ assistant; SD: ~~Standard-standard~~ deviation

361

## 362 Acknowledgements

363 We thank the Institute for General Medicine, University Hospital Essen, for supporting the  
364 conceptualization of the questionnaire, the data collection, and the provision of the data for this  
365 analysis.

366

367

## 368 References

- 369 1. Vu-Eickmann P, Loerbroks A. Psychosoziale Arbeitsbedingungen Medizinischer Fachangestellter:  
370 Ergebnisse einer qualitativen Studie zu den berufsspezifischen Belastungen, Ressourcen,  
371 Präventionsmöglichkeiten und Interventionsbedürfnissen. Z Evid Fortbild Qual Gesundhwes.  
372 2017; 126: 43–51. doi: 10.1016/j.zefq.2017.06.005.
- 373 2. Statistisches Bundesamt. Auszubildene. nach Ausbildungsberufen 2017 (TOP 20), Frauen.  
374 Available:  
375 <https://www.destatis.de/DE/ZahlenFakten/GesellschaftStaat/BildungForschungKultur/BeruflicheBildung/Tabellen/AzubiRangliste.html>. Accessed 12 March 2019.
- 377 3. Freimann T, Merisalu E. Work-related psychosocial risk factors and mental health problems  
378 amongst nurses at a university hospital in Estonia: a cross-sectional study. Scand J Public Health.  
379 2015; 43: 447–452. doi: 10.1177/1403494815579477.
- 380 4. Kern M, Buia A, Tonus C, Weigel TF, Dittmar R, Hanisch E, et al. Psychological stressors,  
381 resources and well-being of surgeons in Germany : A cross-sectional study. Chirurg. 2019.  
382 doi: 10.1007/s00104-018-0780-5.
- 383 5. Ulusoy N, Wirth T, Lincke H-J, Nienhaus A, Schablon A. Psychosocial burdens and strains in  
384 geriatric nursing: comparison of nursing personnel with and without migration background. Z  
385 Gerontol Geriatr. 2018. doi: 10.1007/s00391-018-1414-8.
- 386 6. Wagner A, Rieger MA, Manser T, Sturm H, Hardt J, Martus P, et al. Healthcare professionals'  
387 perspectives on working conditions, leadership, and safety climate: a cross-sectional study. BMC  
388 Health Serv Res. 2019; 19: 53. doi: 10.1186/s12913-018-3862-7.

Formatted: Font: Not Bold

Formatted: Heading 1, Left, Adjust space between Latin and Asian text, Adjust space between Asian text and numbers

Formatted: Space After: 0 pt, Don't adjust space between Latin and Asian text, Don't adjust space between Asian text and numbers

Formatted: Heading 1 Char, Font: 11 pt, Not Bold, German (Germany)

Field Code Changed

Formatted: German (Germany)

- 389 7. Goetz K, Berger S, Gavartina A, Zaroti S, Szecsenyi J. How psychosocial factors affect well-being  
390 of practice assistants at work in general medical care?--a questionnaire survey. *BMC Fam Pract.*  
391 2015; 16: 166. doi: 10.1186/s12875-015-0366-y.
- 392 8. Nolting H-D, Berger J, Niemann D, Genz HO, Kordt M. BGW-DAK Stress-Monitoring 2001.  
393 Überblick über die Ergebnisse einer BGW-DAK-Studie zum Zusammenhang von  
394 Arbeitsbedingungen und Stressbelastung in ausgewählten Berufen; 2001. Available:  
395 [http://people.f3.htw-berlin.de/Professoren/Pruemper/instrumente/KFZA-BGW-DAK-](http://people.f3.htw-berlin.de/Professoren/Pruemper/instrumente/KFZA-BGW-DAK-StressMonitoring_UEBERBLICK.pdf)  
396 [StressMonitoring\\_UEBERBLICK.pdf](http://people.f3.htw-berlin.de/Professoren/Pruemper/instrumente/KFZA-BGW-DAK-StressMonitoring_UEBERBLICK.pdf). Accessed 20 March 2019.
- 397 9. Paquet M, Courcy F, Lavoie-Tremblay M, Gagnon S, Maillet S. Psychosocial work environment  
398 and prediction of quality of care indicators in one Canadian health center. *Worldviews Evid*  
399 *Based Nurs.* 2013; 10: 82–94. doi: 10.1111/j.1741-6787.2012.00250.x.
- 400 10. Theorell T, Hammarstrom A, Aronsson G, Traskman Bendz L, Grape T, Hogstedt C, et al. A  
401 systematic review including meta-analysis of work environment and depressive symptoms. *BMC*  
402 *Public Health.* 2015. doi: 10.1186/s12889-015-1954-4.
- 403 11. Bundesanstalt für Arbeitsschutz und Arbeitsmedizin. Volkswirtschaftliche Kosten durch  
404 Arbeitsunfähigkeit 2017; 2019. Available: [https://www.baua.de/DE/Themen/Arbeitswelt-und-](https://www.baua.de/DE/Themen/Arbeitswelt-und-Arbeitsschutz-im-Wandel/Arbeitsweltberichterstattung/Kosten-der-AU/pdf/Kosten-2017.pdf?__blob=publicationFile&v=4)  
405 [Arbeitschutz-im-Wandel/Arbeitsweltberichterstattung/Kosten-der-AU/pdf/Kosten-](https://www.baua.de/DE/Themen/Arbeitsweltberichterstattung/Kosten-der-AU/pdf/Kosten-2017.pdf?__blob=publicationFile&v=4)  
406 [2017.pdf?\\_\\_blob=publicationFile&v=4](https://www.baua.de/DE/Themen/Arbeitsweltberichterstattung/Kosten-der-AU/pdf/Kosten-2017.pdf?__blob=publicationFile&v=4). Accessed 20 March 2019.
- 407 12. Bundesanstalt für Arbeitsschutz und Arbeitsmedizin. Psychological strain. Available:  
408 [https://www.baua.de/DE/Themen/Arbeitsgestaltung-im-Betrieb/Psychische-](https://www.baua.de/DE/Themen/Arbeitsgestaltung-im-Betrieb/Psychische-Belastung/_functions/BereichsPublikationssuche_Formular.html?nn=8580646)  
409 [Belastung/\\_functions/BereichsPublikationssuche\\_Formular.html?nn=8580646](https://www.baua.de/DE/Themen/Arbeitsgestaltung-im-Betrieb/Psychische-Belastung/_functions/BereichsPublikationssuche_Formular.html?nn=8580646). Accessed 11  
410 March 2019.
- 411 13. Lemyre L, Tessier R. Measuring psychological stress. Concept, model, and measurement  
412 instrument in primary care research. *Can Fam Physician.* 2003; 49: 1159-60, 1166-8.
- 413 14. Rohmert W, Rutenfranz J. Arbeitswissenschaftliche Beurteilung der Belastung und  
414 Beanspruchung an unterschiedlichen industriellen Arbeitsplätzen: Der Bundesminister für Arbeit  
415 und Sozialordnung; 1975.
- 416 15. Rau R, Henkel D. Zusammenhang von Arbeitsbelastungen und psychischen Erkrankungen. *Der*  
417 *Nervenarzt.* 2013; 84: 791–798. doi: 10.1007/s00115-013-3743-6.
- 418 16. Rau R, Buyken D. Der aktuelle Kenntnisstand über Erkrankungsrisiken durch psychische  
419 Arbeitsbelastungen. *Zeitschrift für Arbeits- und Organisationspsychologie A&O.* 2015; 59: 113–  
420 129. doi: 10.1026/0932-4089/a000186.
- 421 17. Gesetz über die Durchführung von Maßnahmen des Arbeitsschutzes zur Verbesserung der  
422 Sicherheit und des Gesundheitsschutzes der Beschäftigten bei der Arbeit (Arbeitsschutzgesetz -  
423 ArbSchG); 2015.
- 424 18. Weigl M, Herbig B, Bahemann A, Böckelmann I, Darius S, Jurkschat R, et al. Recommendations  
425 on developing and carrying out psychosocial risk evaluations at the workplace. *ASU -*  
426 *Arbeitsmed Sozialmed Umweltmed.* 2015: 660–665.
- 427 19. Hahnzog S. Gesund und glücklich arbeiten – Gefährdungsbeurteilung psychischer  
428 Arbeitsbelastung. In: Pfannstiel MA, Mehlich H, editors. *BGM – Ein Erfolgsfaktor für*  
429 *Unternehmen: Lösungen, Beispiele, Handlungsanleitungen.* Wiesbaden: Springer Fachmedien  
430 Wiesbaden; 2018. pp. 681–698.
- 431 20. Richter G. Toolbox Version 1.2. - Instrumente zur Erfassung psychischer Belastungen.; 2010.  
432 Available: <https://www.baua.de/DE/Angebote/Publikationen/Berichte/F1965.html>. Accessed 2  
433 April 2019.
- 434 21. Viehmann A, Kersting C, Thielmann A, Weltermann B. Prevalence of chronic stress in general  
435 practitioners and practice assistants: Personal, practice and regional characteristics. *PLoS ONE.*  
436 2017; 12: e0176658. doi: 10.1371/journal.pone.0176658.

Formatted: German (Germany)

Formatted: German (Germany)

Formatted: German (Germany)

Formatted: German (Germany)

- 437 22. Dreher A, Theune M, Kersting C, Geiser F, Weltermann B. Prevalence of burnout among German  
438 general practitioners: Comparison of physicians working in solo and group practices. PLoS ONE.  
439 2019; 14: e0211223. doi: 10.1371/journal.pone.0211223.
- 440 23. Viehmann A, Thielmann A, Gesenhues S, Weltermann B. Do Academic Family Practices Reflect  
441 Routine Primary Care. Repräsentieren akademische Hausarztpraxen die hausärztliche  
442 Regelversorgung. Eine methodische Annäherung. Z. Allg Med. 2014; 354–360.
- 443 24. Elm E von, Altman DG, Egger M, Pocock SJ, Gøtzsche PC, Vandenbroucke JP. The Strengthening  
444 the Reporting of Observational Studies in Epidemiology (STROBE) statement: guidelines for  
445 reporting observational studies. J Clin Epidemiol. 2008; 61: 344–349.  
446 doi: 10.1016/j.jclinepi.2007.11.008.
- 447 25. Prümper J, Hartmannsgruber K, Frese M. KFZA. Kurz-Fragebogen zur Arbeitsanalyse. European  
448 Economic Review - EUR ECON REV. 1995; 39.
- 449 26. Prümper J. Von der KFZA-Grobanalyse zur IPLV-Feinanalyse Eine Methode zur  
450 Maßnahmenentwicklung in der Evaluierung psychischer Belastung. personal manager. 2015; 2.
- 451 27. Richter G. Toolbox Version 1.2. Instrumente zur Erfassung psychischer Belastungen ; Forschung  
452 Projekt F 1965. 2nd ed. Dortmund: Bundesanstalt für Arbeitsschutz und Arbeitsmedizin; 2011.
- 453 28. Allgemeine Unfallversicherungsanstalt (AUVA). Kurzfragebogen zur Arbeitsanalyse. Available:  
454 <https://fragebogen-arbeitsanalyse.at/login>. Accessed 2 April 2019.
- 455 29. Leittretter S, editor. Arbeit in Krankenhäusern human gestalten. Arbeitshilfe für die Praxis von  
456 Betriebsräten, betrieblichen Arbeitsschutzexperten und Beschäftigten in Krankenhäusern.  
457 Düsseldorf: Hans-Böckler-Stiftung; 2008.
- 458 30. Orgambidez-Ramos A, Almeida H de. Work engagement, social support, and job satisfaction in  
459 Portuguese nursing staff: A winning combination. Appl Nurs Res. 2017; 36: 37–41.  
460 doi: 10.1016/j.apnr.2017.05.012.
- 461 31. Szecsenyi J, Goetz K, Campbell S, Broge B, Reuschenbach B, Wensing M. Is the job satisfaction of  
462 primary care team members associated with patient satisfaction. BMJ Quality & Safety.  
463 2011; 20: 508. doi: 10.1136/bmjqs.2009.038166.
- 464 32. Schneider A, Weigl M. Associations between psychosocial work factors and provider mental  
465 well-being in emergency departments: A systematic review. PLoS ONE. 2018.  
466 doi: 10.1371/journal.pone.0197375.
- 467 33. Halter M, Boiko O, Pelone F, Beighton C, Harris R, Gale J, et al. The determinants and  
468 consequences of adult nursing staff turnover: a systematic review of systematic reviews. BMC  
469 Health Serv Res. 2017. doi: 10.1186/s12913-017-2707-0.
- 470

Formatted: German (Germany)

Formatted: German (Germany)





**Response to Editor**

PONE-D-20-07803

Practice assistants' perceived mental work load: A cross-sectional study with 550 German participants addressing work content, stressors, resources, and organizational structure

PLOS ONE

*Dear Dr. Useche,*

*We like to thank you and the reviewers for the very helpful advices.  
Please find our revision and answers to the open points enclosed.*

*Best regards,  
Jan Hoffmann*

Journal Requirements:

When submitting your revision, we need you to address these additional requirements.

1. Please ensure that your manuscript meets PLOS ONE's style requirements, including those for file naming. The PLOS ONE style templates can be found at

[https://journals.plos.org/plosone/s/file?id=wjVg/PLOSONe\\_formatting\\_sample\\_main\\_body.pdf](https://journals.plos.org/plosone/s/file?id=wjVg/PLOSONe_formatting_sample_main_body.pdf)  
and

[https://journals.plos.org/plosone/s/file?id=ba62/PLOSONe\\_formatting\\_sample\\_title\\_authors\\_affiliations.pdf](https://journals.plos.org/plosone/s/file?id=ba62/PLOSONe_formatting_sample_title_authors_affiliations.pdf)

Answer: Our manuscript now meets all style requirements.

2. We suggest you thoroughly copyedit your manuscript for language usage, spelling, and grammar. If you do not know anyone who can help you do this, you may wish to consider employing a professional scientific editing service.

Whilst you may use any professional scientific editing service of your choice, PLOS has partnered with both American Journal Experts (AJE) and Editage to provide discounted services to PLOS authors. Both organizations have experience helping authors meet PLOS guidelines and can provide language editing, translation, manuscript formatting, and figure formatting to ensure your manuscript meets our submission guidelines. To take advantage of our partnership with AJE, visit the AJE website (<http://learn.aje.com/plos/>) for a 15% discount off AJE services. To take advantage of our partnership with Editage, visit the Editage website ([www.editage.com](http://www.editage.com)) and enter referral code PLOSEEDIT for a 15% discount off Editage services. If the PLOS editorial team finds any language issues in text that either AJE or Editage has edited, the service provider will re-edit the text for free.

Upon resubmission, please provide the following:

- a) The name of the colleague or the details of the professional service that edited your manuscript
- b) A copy of your manuscript showing your changes by either highlighting them or using track changes (uploaded as a \*supporting information\* file)
- c) A clean copy of the edited manuscript (uploaded as the new \*manuscript\* file)

Answer: The manuscript was proofread by a professional medical translator (Sarah Chalmers; <https://www.medi-translate.com/>)

3. We note that you have indicated that data from this study are available upon request. PLOS only allows data to be available upon request if there are legal or ethical restrictions on sharing data publicly. For information on unacceptable data access restrictions, please see <http://journals.plos.org/plosone/s/data-availability#loc-unacceptable-data-access-restrictions>.

In your revised cover letter, please address the following prompts:

a) If there are ethical or legal restrictions on sharing a de-identified data set, please explain them in detail (e.g., data contain potentially identifying or sensitive patient information) and who has imposed them (e.g., an ethics committee). Please also provide contact information for a data access committee, ethics committee, or other institutional body to which data requests may be sent.

b) If there are no restrictions, please upload the minimal anonymized data set necessary to replicate your study findings as either Supporting Information files or to a stable, public repository and provide us with the relevant URLs, DOIs, or accession numbers. Please see <http://www.bmj.com/content/340/bmj.c181.long> for guidelines on how to de-identify and prepare clinical data for publication. For a list of acceptable repositories, please see <http://journals.plos.org/plosone/s/data-availability#loc-recommended-repositories>.

We will update your Data Availability statement on your behalf to reflect the information you provide.

Answer: The data cannot be shared publicly because of ethical restrictions and data protection issues as our dataset includes potentially identifying information.

4. Please ensure that you refer to Figure 1 in your text as, if accepted, production will need this reference to link the reader to the figure.

Answer: A reference to Figure 1 is now included (line 208).

*“As illustrated in Fig 1, the comparison of our results with data from Nolting et al. [8] revealed statistically significant differences ( $p < 0.05$ ) for the following factors: versatility (3.6*

vs. 3.8), *completeness of task* (3.5 vs. 3.6), *scope of action* (3.4 vs. 3.8), *social support* (4.0 vs. 3.7), *cooperation* (3.6 vs. 3.4), *qualitative work demands* (2.2 vs. 2.1), *works disruptions* (2.7 vs. 2.4), *information and participation* (3.6 vs. 3.3), and *benefits* (2.9 vs. 2.4).”

5. We note you have included a table to which you do not refer in the text of your manuscript. Please ensure that you refer to Table 4 in your text; if accepted, production will need this reference to link the reader to the Table.

Answer: A reference to Table 4 is now included (line 221).

*“Table 4 shows a comparison of PrAs in our study population (from 2014) and the comparative study population (from 2000).”*

[Note: HTML markup is below. Please do not edit.]

### **Reviewers' comments:**

Reviewer's Responses to Questions

#### **Comments to the Author**

1. Is the manuscript technically sound, and do the data support the conclusions?

The manuscript must describe a technically sound piece of scientific research with data that supports the conclusions. Experiments must have been conducted rigorously, with appropriate controls, replication, and sample sizes. The conclusions must be drawn appropriately based on the data presented.

Reviewer #1: Yes

---

2. Has the statistical analysis been performed appropriately and rigorously?

Reviewer #1: Yes

---

3. Have the authors made all data underlying the findings in their manuscript fully available?

The [PLOS Data policy](#) requires authors to make all data underlying the findings described in their manuscript fully available without restriction, with rare exception (please refer to the Data Availability Statement in the manuscript PDF file). The data should be provided as part of the manuscript or its supporting information, or deposited to a public repository. For example, in addition to summary statistics, the data points behind means, medians and variance measures

should be available. If there are restrictions on publicly sharing data—e.g. participant privacy or use of data from a third party—those must be specified.

Reviewer #1: No

Answer: The data cannot be shared publicly because of ethical restrictions and data protection issues as our dataset includes potentially identifying information.

---

4. Is the manuscript presented in an intelligible fashion and written in standard English?

PLOS ONE does not copyedit accepted manuscripts, so the language in submitted articles must be clear, correct, and unambiguous. Any typographical or grammatical errors should be corrected at revision, so please note any specific errors here.

Reviewer #1: No

Answer: The manuscript was proofread by a certified medical translator.

---

#### 5. Review Comments to the Author

Please use the space provided to explain your answers to the questions above. You may also include additional comments for the author, including concerns about dual publication, research ethics, or publication ethics. (Please upload your review as an attachment if it exceeds 20,000 characters)

Reviewer #1:

1. The manuscript is full of typography errors; punctuations.

Answer: The manuscript was proofread by a professional medical translator.

2. Language is main problem

Answer: The manuscript was proofread by a professional medical translator.

3. Not consistent throughout the document

Answer: The manuscript was proofread by a professional medical translator.

4. Don't use abbreviation in the abstract part

Answer: This was corrected.

5. In the background part there are incomplete sentences

Answer: This was corrected.

6. In tables the decimal places should be consistent

Answer: This was corrected in Tables 1, 2,3 and 4.

7. In the table reporting missing value is not necessary

Answer: This was corrected in Tables 1 and 2.

---

6. PLOS authors have the option to publish the peer review history of their article ([what does this mean?](#)). If published, this will include your full peer review and any attached files.

If you choose “no”, your identity will remain anonymous but your review may still be made public.

**Do you want your identity to be public for this peer review?** For information about this choice, including consent withdrawal, please see our [Privacy Policy](#).

Reviewer #1: No

#### **Answer to reviewer comment concerning response rate**

Reviewer comment: “Statistically how it can be generalized with around 30% non-response rate?”

Answer: The argument in our sentence was incorrect. The total study had a response rate of 70% of practices. Within the practices, nearly all physicians and practice assistants participated indicating a high interest in the topic.

The text was revised to: It is a strength of our study that it was based on a data set with a large number of participants (550 PrAs). Also, prior analyses had shown that the practice network from which this sample was taken is representative for German primary care practices.
